# Supplementary material for: The μ-opioid receptor differentiates two distinct human nociceptive populations relevant to clinical pain
Source: PubMed Central journal article supplement — Cell Rep Med. 2024 Oct 15;5(10):101788. doi: 10.1016/j.xcrm.2024.101788 (PMC11513826; doi:10.1016/j.xcrm.2024.101788), 2024-10-15
Supplement: mmc1.pdf [file mmc1.pdf]

**Cell Reports Medicine, Volume 5**

**Supplemental information**

**The  $\mu$ -opioid receptor differentiates  
two distinct human nociceptive  
populations relevant to clinical pain**

**Ellen S. Staedtler, Matthew R. Sapio, Diana M. King, Dragan Maric, Andre Ghetti, Andrew J. Mannes, and Michael J. Iadarola**

**Table S1. Efficacy of systemic opioids on human experimental heat pain, related to Figure 1, Introduction, and Discussion.**

| Author, year                               | Study specifics                                      | Analgesic (dose & ROA)                                                 | Testing specifications   | Effect on pain measures                                                                                                                              |
|--------------------------------------------|------------------------------------------------------|------------------------------------------------------------------------|--------------------------|------------------------------------------------------------------------------------------------------------------------------------------------------|
| Stacher et al. 1983 <sup>[S1]</sup>        | Double-blind, placebo-controlled                     | Meptazinol (100 mg, 200 mg, 400 mg po), Pentazocine (50 mg, 100 mg po) | Radiant heat on skin     | No effect on pain detection thresholds for 100 mg Meptazinol, increase of pain detection thresholds for 200 mg and 400 mg Meptazinol and Pentazocine |
| Van Der Burgth et al. 1994 <sup>[S2]</sup> | Double-blind, placebo-controlled                     | Morphine (0.15 mg/kg iv)                                               | 200 ms laser stimulation | No effect on warmth detection thresholds                                                                                                             |
| Gustorff et al. 2003 <sup>[S3]</sup>       | Double-blind, active placebo-controlled              | Remifentanyl (0.08 µg/kg*min iv)                                       | Contact heat on skin     | Increase of pain detection thresholds and pain tolerance                                                                                             |
| Naef et al. 2003 <sup>[S4]</sup>           | Double-blind, (active) placebo-controlled            | Morphine (30 mg po)                                                    | Contact heat on skin     | No effect on pain detection thresholds and pain tolerance                                                                                            |
| Angst et al. 2004 <sup>[S5]</sup>          | Double-blind, (active) placebo-controlled, crossover | Alfentanil (20, 40, 80, and 160 ng/ml plasma concentrations iv)        | Contact heat on skin     | Increase of pain detection thresholds and pain tolerance                                                                                             |
| Cortinez et al. 2004 <sup>[S6]</sup>       | (active) placebo-controlled, crossover               | Remifentanyl (1-4 ng/ml plasma concentrations, iv)                     | Contact heat on skin     | Decrease in pain ratings                                                                                                                             |
| Fillingim et al. 2005 <sup>[S7]</sup>      | Double-blind, placebo-controlled, crossover          | Morphine (0.08 mg/kg iv)                                               | Contact heat on skin     | Increase of pain detection thresholds and pain tolerance, decrease of pain intensity ratings                                                         |
| Arendt-Nielsen et al. 2009 <sup>[S8]</sup> | Double-blind, (active) placebo-controlled, crossover | Oxycodone (15 mg po)                                                   | Contact heat esophagus   | Increase in pain detection thresholds                                                                                                                |
| Eisenberg et al. 2010 <sup>[S9]</sup>      | Double-blind, active placebo controlled              | Oxycodone (0.3mg/kg po)                                                | Contact heat on skin     | No effect on pain detection thresholds                                                                                                               |
| Andresen et al. 2011 <sup>[S10]</sup>      | Double-blind, placebo-controlled, crossover          | Fentanyl (25 µg/h, transdermal), Buprenorphine (20 µg/h, transdermal)  | Contact heat on skin     | No effect on pain tolerance (Fentanyl), increase of pain tolerance (Buprenorphine)                                                                   |
| Angst et al. 2012 <sup>[S11]</sup>         | Double-blind, placebo-controlled                     | Alfentanil (100 ng/ml plasma concentration, iv)                        | Contact heat on skin     | Increase of pain detection threshold                                                                                                                 |

|                                          |                                                      |                                                     |                                 |                                                                                                                                                                                                                                                                                              |
|------------------------------------------|------------------------------------------------------|-----------------------------------------------------|---------------------------------|----------------------------------------------------------------------------------------------------------------------------------------------------------------------------------------------------------------------------------------------------------------------------------------------|
| King et al. 2013 <sup>[S12]</sup>        | Double-blind, (active) placebo-controlled, crossover | Morphine (0.08mg/kg iv), Pentazocine (0.5 mg/kg iv) | Contact heat on skin            | Increase of pain detection threshold and pain tolerance, decrease of pain intensity ratings for temporal summation trials (Morphine).<br>No effect on pain detection thresholds, increase of pain tolerance, decrease of pain intensity ratings for temporal summation trials (Pentazocine). |
| Olesen et al. 2014 <sup>[S13]</sup>      | Double-blind, placebo-controlled, crossover          | Morphine (30 mg po)                                 | Contact heat on skin and rectal | No effect on pain tolerance (all testing locations)                                                                                                                                                                                                                                          |
| Prosenz & Gustorff 2017 <sup>[S14]</sup> | Double-blind, (active) placebo-controlled, crossover | Fentanyl (1 µg/kg iv)                               | Contact heat on skin            | Decrease in pain ratings                                                                                                                                                                                                                                                                     |

These studies explored mostly noxious heat on superficial tissue (skin). Opioids show analgesic efficacy in the majority of studies, with more consistent effect on pain tolerance than pain thresholds. Given the nature of the majority of stimuli (heat ramp), pain thresholds are reached faster and at lower temperatures (more phasic stimulation) than pain tolerance (more sustained stimulation, reaching deeper skin layers).

**Table S2. Efficacy of systemic opioids on human experimental cold pain, related to Figure 4, Figure S6, Introduction, and Discussion.**

| Author, year                          | Study specifics                             | Analgesic (dose & ROA)                                                    | Testing specifications | Effect on pain measures                                                                                      |
|---------------------------------------|---------------------------------------------|---------------------------------------------------------------------------|------------------------|--------------------------------------------------------------------------------------------------------------|
| Wolff et al. 1966 <sup>[S15]</sup>    | Crossover, placebo-controlled               | Morphine (10 mg im)                                                       | Cold pressor test      | No effect on pain threshold, increase in pain tolerance, decrease in pain sensitivity                        |
| Jarvik et al. 1981 <sup>[S16]</sup>   | Crossover, placebo-controlled               | Morphine (10 mg/70 kg iv)                                                 | Cold pressor test      | Increase of pain detection threshold and pain tolerance (tolerance > detection threshold)                    |
| Posner et al. 1985 <sup>[S17]</sup>   | Double-blind, placebo-controlled, crossover | Dipipanone (2mg, 4mg, 8mg po)                                             | Cold pressor test      | Decrease in pain ratings for 4mg and 8mg dipipanone                                                          |
| Holland et al. 1987 <sup>[S18]</sup>  | Double-blind, placebo-controlled, crossover | Dipipanone (8mg po)                                                       | Cold pressor test      | Decrease in pain intensity ratings                                                                           |
| Cleeland et al. 1996 <sup>[S19]</sup> | Double-blind, active placebo controlled     | Morphine (0.214 mg/kg po, 0.286 mg/kg po, 0.357 mg/kg po, 0.429 mg/kg po) | Cold pressor test      | No effect on pain intensity and unpleasantness ratings, increase in pain tolerance for highest dose morphine |
| Gustorff et al. 2003 <sup>[S3]</sup>  | Double-blind, active placebo controlled     | Remifentanyl (0.08 µg/kg*min)                                             | Contact cold on skin   | No effect on pain detection thresholds and pain tolerance                                                    |

|                                              |                                                          |                                                                       |                      |                                                                |
|----------------------------------------------|----------------------------------------------------------|-----------------------------------------------------------------------|----------------------|----------------------------------------------------------------|
| Naef et al. 2003 <sup>[S4]</sup>             | Double-blind, (active) placebo-controlled                | Morphine (30 mg po)                                                   | Cold pressor test    | Decrease in pain intensity ratings, increase in pain tolerance |
| Eisenberg et al. 2010 <sup>[S9]</sup>        | Double-blind, active placebo controlled                  | Oxycodone (0.3mg/kg po)                                               | Cold pressor test    | Decrease in pain intensity ratings, increase in pain tolerance |
| Eisenberg et al. 2010 <sup>[S9]</sup>        | Double-blind, active placebo controlled                  | Oxycodone (0.3mg/kg po)                                               | Contact cold on skin | No effect on pain detection threshold                          |
| Andresen et al. 2011 <sup>[S10]</sup>        | Double-blind, placebo-controlled, crossover              | Fentanyl (25 µg/h, transdermal), Buprenorphine (20 µg/h, transdermal) | Cold pressor test    | Decrease of pain intensity ratings                             |
| Angst et al. 2012 <sup>[S11]</sup>           | Double-blind, placebo-controlled                         | Alfentanil (100 ng/ml plasma concentration iv)                        | Cold pressor test    | Increase of pain detection threshold and pain tolerance        |
| Olesen et al. 2014 <sup>[S13]</sup>          | Double-blind, placebo-controlled, crossover              | Morphine (30 mg po)                                                   | Cold pressor test    | Decrease of pain intensity ratings                             |
| Winchester et al. 2014 <sup>[S20]</sup>      | Double-blind, crossover (dose scalation for PF-05105679) | Oxycodone (20 mg po)                                                  | Cold pressor test    | Decrease of pain intensity ratings                             |
| Kleine-Borgmann et al. 2021 <sup>[S21]</sup> | Double-blind, placebo-controlled                         | Tilidin/Naloxone (100/8, 150/4 mg po)                                 | Cold pressor test    | Decrease of pain intensity ratings, increase of pain tolerance |
| Watso et al. 2022 <sup>[S22]</sup>           | Blinded, placebo-controlled, crossover                   | Fentanyl (0.075 mg iv)                                                | Cold pressor test    | Decrease of pain intensity ratings                             |

These studies explored mostly prolonged exposure to noxious cold. Opioids show analgesic efficacy in the majority of those studies, with more consistent effect on pain tolerance than pain thresholds. Studies that employ contact cold (superficial tissue) do not show an analgesic effect of opioids.

**Table S3. Efficacy of systemic opioids on human experimental pressure pain, related to Figure 5, Introduction, and Discussion.**

| Author, year                          | Study specifics                             | Analgesic (dose & ROA)  | Testing specifications | Effect on pain measures     |
|---------------------------------------|---------------------------------------------|-------------------------|------------------------|-----------------------------|
| Naef et al. 2003 <sup>[S4]</sup>      | Double-blind, (active) placebo-controlled   | Morphine (30 mg po)     | Finger pulp            | Increase in pain tolerance  |
| Fillingim et al. 2005 <sup>[S7]</sup> | Double-blind, placebo-controlled, crossover | Morphine (0.08mg/kg iv) | Muscle and bone        | Increase in pain thresholds |

|                                            |                                                      |                                                                       |                      |                                                                                    |
|--------------------------------------------|------------------------------------------------------|-----------------------------------------------------------------------|----------------------|------------------------------------------------------------------------------------|
| Arendt-Nielsen et al. 2009 <sup>[S8]</sup> | Double-blind, (active) placebo-controlled, crossover | Oxycodone (15 mg po)                                                  | Muscle               | No effect on pain thresholds and pain tolerance                                    |
| Andresen et al. 2011 <sup>[S10]</sup>      | Double-blind, placebo-controlled, crossover          | Fentanyl (25 µg/h, transdermal), Buprenorphine (20 µg/h, transdermal) | Bone                 | No effect on pain tolerance (Fentanyl), increase in pain tolerance (Buprenorphine) |
| King et al. 2013 <sup>[S12]</sup>          | Double-blind, (active) placebo-controlled, crossover | Morphine (0.08mg/kg iv), Pentazocine (0.5 mg/kg iv)                   | Muscle, bone         | Increase in pain threshold                                                         |
| Olesen et al. 2014 <sup>[S13]</sup>        | Double-blind, placebo-controlled, crossover          | Morphine (30 mg po)                                                   | Muscle, bone, rectal | Increase of pain tolerance (all testing locations)                                 |
| Prosenz & Gustorff 2017 <sup>[S14]</sup>   | Double-blind, (active) placebo-controlled, crossover | Fentanyl (1 µg/kg iv)                                                 | Muscle               | Increase in pain threshold                                                         |

These studies used sustained, increasing pressure stimulation to skin and underlying deep tissues. Opioids show analgesic efficacy in the majority of those studies.

**Table S4. Efficacy of systemic opioids on human experimental ischemic pain, related to Figure 5, Introduction, and Discussion.**

| Author, year                               | Study specifics                                      | Analgesic (dose & ROA)                              | Testing specifications                   | Effect on pain measures                                                                     |
|--------------------------------------------|------------------------------------------------------|-----------------------------------------------------|------------------------------------------|---------------------------------------------------------------------------------------------|
| Fillingim et al. 2005 <sup>[S7]</sup>      | Double-blind, placebo-controlled, crossover          | Morphine (0.08mg/kg iv)                             | Modified submaximal tourniquet procedure | Increase in pain thresholds and pain tolerance, decrease in pain and unpleasantness ratings |
| Arendt-Nielsen et al. 2009 <sup>[S8]</sup> | Double-blind, (active) placebo-controlled, crossover | Oxycodone (15 mg po)                                | Tourniquet procedure                     | Increase in pain thresholds and pain tolerance                                              |
| King et al. 2013 <sup>[S12]</sup>          | Double-blind, (active) placebo-controlled, crossover | Morphine (0.08mg/kg iv), Pentazocine (0.5 mg/kg iv) | Modified submaximal tourniquet procedure | Increase in pain thresholds and pain tolerance                                              |

These studies used a sustained tourniquet to induce ischemic pain. Opioids showed efficacy on both pain thresholds and pain tolerance.

**Table S5. Efficacy of systemic opioids on other human experimental pain models, related to Figure 6, Introduction, and Discussion.**

| Author, year                               | Study specifics                                      | Analgesic (dose & ROA)                                                | Testing specifications                                       | Effect on pain measures                                                                                                    |
|--------------------------------------------|------------------------------------------------------|-----------------------------------------------------------------------|--------------------------------------------------------------|----------------------------------------------------------------------------------------------------------------------------|
| Andresen et al. 2011 <sup>[S10]</sup>      | Double-blind, placebo-controlled, crossover          | Fentanyl (25 µg/h, transdermal), Buprenorphine (20 µg/h, transdermal) | Intramuscular NGF injection, pressure testing post-injection | No effect on pressure tolerance thresholds (Fentanyl), increase in pressure tolerance thresholds (Buprenorphine)           |
| Arendt-Nielsen et al. 2009 <sup>[S8]</sup> | Double-blind, (active) placebo-controlled, crossover | Oxycodone (15 mg po)                                                  | Skin pinch, esophageal pressure                              | Pinch: Increase in pain tolerance<br>Esophageal pressure: Increase in pain detection threshold and moderate pain threshold |

NGF-induced muscle soreness (sustained stimulus, deep tissue) was partially responsive to opioids. An opioid agonist showed efficacy with prolonged noxious mechanical stimulation of superficial and visceral tissue.

**Table S6. Intrathecal opioids and clinical pain, related to Figure 7, Introduction, and Discussion.**

| Author, year                          | Study specifics               | Clinical Indication                  | Analgesic                                                   | Effect on pain                                                      |
|---------------------------------------|-------------------------------|--------------------------------------|-------------------------------------------------------------|---------------------------------------------------------------------|
| Samii et al. 1979 <sup>[S23]</sup>    | No placebo control            | Intractable cancer pain (mixed pain) | Morphine (1-3 mg it), Pethidine (10-30 mg it)               | Complete analgesia                                                  |
| Wang et al. 1979 <sup>[S24]</sup>     | Double-blind, placebo control | Intractable cancer pain (mixed pain) | Morphine (0.5 mg, 1.0 mg it)                                | Complete analgesia                                                  |
| Baraka et al. 1981 <sup>[S25]</sup>   | No placebo control            | First stage labor pain               | Morphine (1mg, 2mg it)                                      | Complete analgesia                                                  |
| Gray et al. 1986 <sup>[S26]</sup>     | No placebo control            | Postsurgical pain (thoracotomy)      | Morphine (10 µg/kg it)                                      | Excellent analgesia                                                 |
| Abboud et al. 1988 <sup>[S27]</sup>   | Double-blind, placebo control | Postsurgical pain (Cesarean section) | Morphine (0.25 mg, 0.1 mg it)                               | Analgesia, significantly stronger than placebo                      |
| Kirson et al. 1989 <sup>[S28]</sup>   | Double-blind, active control  | Postsurgical pain                    | Morphine (0.1 mg, 0.2 mg it)<br>Control: Lidocaine 75 mg it | Analgesia, significantly stronger than control for both dose levels |
| Leighton et al. 1989 <sup>[S29]</sup> | No placebo control            | Labor pain                           | Fentanyl (25 µg it) with Morphine (0.25 mg it)              | Significant decrease in pain ratings                                |
| Cohen et al. 1993 <sup>[S30]</sup>    | No placebo control            | First stage labor pain               | Sufentanil (10 µg in 1ml it)                                | Analgesia                                                           |

|                                        |                              |                                                                               |                                                                                                                                                  |                                                                                                             |
|----------------------------------------|------------------------------|-------------------------------------------------------------------------------|--------------------------------------------------------------------------------------------------------------------------------------------------|-------------------------------------------------------------------------------------------------------------|
| D'Angelo et al. 1994 <sup>[S31]</sup>  | Double-blind, active control | Labor pain                                                                    | Sufentanil (10 µg in 2ml it)<br>Control: Bupivacaine (30 mg epidural)                                                                            | Significant decrease in pain ratings to control, high degree of patient satisfaction                        |
| Angel et al. 1998 <sup>[S32]</sup>     | No placebo control           | “Failed back” pain (nociceptive and neuropathic pain), spinal cord damage     | Morphine per intrathecal drug delivery system                                                                                                    | Mixed results, 27% unresponsive                                                                             |
| Schuchard et al. 1998 <sup>[S33]</sup> | No placebo control           | Nonmalignant chronic pain, nociceptive, neuropathic or mixed                  | Morphine per intrathecal drug delivery system                                                                                                    | Pain reduction in all patients with nociceptive pain, partly in other pain etiologies (mixed > neuropathic) |
| Anderson et al. 1999 <sup>[S34]</sup>  | No placebo control           | Nonmalignant chronic pain, nociceptive (3%), neuropathic (47%) or mixed (50%) | Morphine per intrathecal drug delivery system                                                                                                    | Significant pain relief in 50% of patients                                                                  |
| Gwartz et al. 1999 <sup>[S35]</sup>    | No placebo control           | Postsurgical pain                                                             | Morphine (0.2-0.8mg it)                                                                                                                          | High patient satisfaction with analgesia                                                                    |
| Shaladi et al. 2007 <sup>[S36]</sup>   | No placebo control           | Pain from vertebral fractures due to osteoporosis                             | Morphine per intrathecal drug delivery system                                                                                                    | Clinically significant pain relief                                                                          |
| Zacast et al. 2009 <sup>[S37]</sup>    | No placebo control           | Refractory postherpetic neuralgia                                             | Morphine per intrathecal drug delivery system                                                                                                    | Partial pain relief                                                                                         |
| Fabiano et al. 2012 <sup>[S38]</sup>   | No placebo control           | Postherpetic neuralgia                                                        | Morphine, Morphine + Bupivacaine, Sufentanil, Sufentanil + Bupivacaine, Sufentanil + Bupivacaine + Clonidine (intrathecal drug delivery systems) | Clinically significant pain reduction                                                                       |

Intrathecal applied opioids are very efficacious in relieving clinical nociceptive pain. Studies that included patients with neuropathic pain or a neuropathic pain component show mixed results. These studies provide functional support for our molecular-anatomically based findings of two main nociceptive populations: a population associated with sustained pain due to tissue damage (nociceptive pain) that expresses transcripts for the  $\mu$ -opioid receptor, and a population that serves as a superficially located biowarning system and does not express transcripts for the  $\mu$ -opioid receptor, hence, whose activity cannot be attenuated by clinically used opioids. These nociceptors contribute to neuropathic pain in rodents.<sup>[S39,S40]</sup> We therefore hypothesize that the poor responsiveness of neuropathic pain to opioids can be at least partially explained by the lack of  $\mu$ -opioid receptor expression of these nociceptive fibers.

**Table S7. Neuron population counts for experiment 1 (TRPV1, OPRM1, OPRD1, OPRK1), related to Figure 1.**

|                                 | <b>Donor 1</b> | <b>Donor 2</b> | <b>Donor 3</b> | <b>Donor 4</b> |
|---------------------------------|----------------|----------------|----------------|----------------|
| <i>TRPV1+OPRM1+</i>             | 99             | 77             | 95             | 124            |
| <i>TRPV1+OPRM1+OPRD1</i>        | 68             | 77             | 64             | 68             |
| <i>TRPV1+OPRM1+OPRK1+</i>       | 1              | 0              | 0              | 0              |
| <i>TRPV1+OPRM1+OPRD1+OPRK1+</i> | 0              | 4              | 2              | 3              |
| <i>TRPV1+</i>                   | 17             | 6              | 9              | 10             |
| <i>TRPV1+OPRD1+</i>             | 91             | 83             | 79             | 50             |
| <i>TRPV1+OPRD1+OPRK1+</i>       | 0              | 1              | 4              | 5              |
| <i>OPRM1+</i>                   | 5              | 9              | 0              | 6              |
| <i>OPRD1+</i>                   | 7              | 14             | 11             | 5              |
| <i>OPRM1+OPRD1+</i>             | 3              | 7              | 3              | 5              |
| no marker                       | 48             | 40             | 39             | 41             |

This table presents the number of DRG neurons expressing individual marker combinations for each individual tissue donor. The most prevalent populations were further characterized. These results are shown in Figure 1.

**Table S8. Neuron population counts for experiment 2 (TRPV1, OPRM1, OPRL1, SPP1), related to Figure 2.**

|                                | <b>Donor 1</b> | <b>Donor 2</b> | <b>Donor 3</b> | <b>Donor 4</b> |
|--------------------------------|----------------|----------------|----------------|----------------|
| <i>TRPV1+OPRM1+</i>            | 98             | 93             | 50             | 80             |
| <i>TRPV1+OPRM1+OPRL1+</i>      | 90             | 72             | 117            | 117            |
| <i>TRPV1+OPRM1+OPRL1+SPP1+</i> | 9              | 9              | 5              | 2              |
| <i>TRPV1+</i>                  | 79             | 68             | 83             | 74             |
| <i>TRPV1+OPRL1+</i>            | 7              | 12             | 13             | 11             |
| <i>TRPV1+OPRL1+SPP1+</i>       | 5              | 6              | 13             | 4              |
| <i>OPRM1+OPRL1+</i>            | 4              | 0              | 0              | 1              |
| <i>OPRM1+OPRL1+SPP1+</i>       | 2              | 1              | 1              | 0              |
| <i>SPP1+</i>                   | 4              | 13             | 1              | 0              |
| <i>OPRL1+SPP1+</i>             | 28             | 33             | 26             | 37             |
| no marker                      | 1              | 2              | 2              | 4              |

This table presents the number of DRG neurons expressing individual marker combinations for each individual tissue donor. The most prevalent populations were further characterized. These results are shown in Figure 2.



**Table S9. Neuron population counts for experiment 3 (*TRPV1*, *OPRM1*, *SCN10A*, *SCN11A*), related to Figure 3.**

|                                   | <b>Donor 1</b> | <b>Donor 2</b> | <b>Donor 3</b> | <b>Donor 4</b> |
|-----------------------------------|----------------|----------------|----------------|----------------|
| <i>TRPV1+OPRM1+</i>               | 3              | 1              | 1              | 2              |
| <i>TRPV1+OPRM1+SCN10A+</i>        | 1              | 1              | 5              | 4              |
| <i>TRPV1+OPRM1+SCN11A+</i>        | 6              | 6              | 7              | 6              |
| <i>TRPV1+OPRM1+SCN10A+SCN11A+</i> | 164            | 177            | 164            | 197            |
| <i>TRPV1</i>                      | 5              | 7              | 7              | 2              |
| <i>TRPV1+SCN10A+</i>              | 0              | 1              | 1              | 0              |
| <i>TRPV1+SCN11A+</i>              | 0              | 5              | 2              | 2              |
| <i>TRPV1+SCN10A+SCN11A+</i>       | 97             | 90             | 91             | 94             |
| <i>OPRM1+SCN11A+</i>              | 2              | 0              | 3              | 2              |
| <i>OPRM1+SCN10A+SCN11A+</i>       | 0              | 1              | 0              | 3              |
| <i>OPRM1+</i>                     | 0              | 0              | 1              | 1              |
| <i>SCN11A+</i>                    | 0              | 1              | 0              | 0              |
| no marker                         | 55             | 34             | 29             | 29             |

This table presents the number of DRG neurons expressing individual marker combinations for each individual tissue donor. The most prevalent populations were further characterized. These results are shown in Figure 3.

**Table S10. Neuron population counts for experiment 4 (*TRPV1*, *OPRM1*, *TRPA1*, *TAC1*), related to Figure 4.**

|                                | <b>Donor 1</b> | <b>Donor 2</b> | <b>Donor 3</b> | <b>Donor 4</b> |
|--------------------------------|----------------|----------------|----------------|----------------|
| <i>TRPV1+OPRM1+</i>            | 86             | 47             | 67             | 98             |
| <i>TRPV1+OPRM1+TAC1+</i>       | 22             | 68             | 42             | 45             |
| <i>TRPV1+OPRM1+TRPA1+TAC1+</i> | 63             | 64             | 57             | 32             |
| <i>TRPV1+OPRM1+TRPA1+</i>      | 30             | 17             | 8              | 30             |
| <i>TRPV1+</i>                  | 37             | 28             | 30             | 25             |
| <i>TRPV1+TRPA1+</i>            | 54             | 52             | 41             | 39             |
| <i>TRPV1+TAC1+</i>             | 2              | 5              | 2              | 3              |
| <i>TRPV1+TRPA1+TAC1+</i>       | 0              | 0              | 2              | 0              |
| <i>OPRM1+</i>                  | 6              | 10             | 9              | 8              |
| <i>TAC1+</i>                   | 1              | 2              | 0              | 0              |
| no marker                      | 39             | 56             | 57             | 32             |

This table presents the number of DRG neurons expressing individual marker combinations for each individual tissue donor. The most prevalent populations were further characterized. These results are shown in Figure 4.

**Table S11. Neuron population counts for experiment 5 (*TRPV1*, *OPRM1*, *TRPA1*, *TRPM8*), related to Figure S6.**

|                                                             | <b>Donor 1</b> | <b>Donor 2</b> | <b>Donor 3</b> | <b>Donor 4</b> |
|-------------------------------------------------------------|----------------|----------------|----------------|----------------|
| <i>TRPV1</i> + <i>OPRM1</i> +                               | 46             | 48             | 28             | 37             |
| <i>TRPV1</i> + <i>OPRM1</i> + <i>TRPA1</i> +                | 20             | 28             | 11             | 19             |
| <i>TRPV1</i> + <i>OPRM1</i> + <i>TRPM8</i> +                | 40             | 43             | 52             | 70             |
| <i>TRPV1</i> + <i>OPRM1</i> + <i>TRPA1</i> + <i>TRPM8</i> + | 54             | 56             | 60             | 96             |
| <i>TRPV1</i> +                                              | 41             | 27             | 42             | 17             |
| <i>TRPV1</i> + <i>TRPA1</i> +                               | 64             | 50             | 53             | 52             |
| <i>TRPV1</i> + <i>TRPM8</i> +                               | 0              | 3              | 7              | 5              |
| <i>TRPV1</i> + <i>TRPA1</i> + <i>TRPM8</i> +                | 5              | 2              | 1              | 1              |
| <i>OPRM1</i> +                                              | 5              | 11             | 7              | 12             |
| <i>OPRM1</i> + <i>TRPA1</i> +                               | 0              | 1              | 0              | 1              |
| <i>OPRM1</i> + <i>TRPM8</i> +                               | 0              | 6              | 12             | 1              |
| <i>OPRM1</i> + <i>TRPA1</i> + <i>TRPM8</i> +                | 0              | 2              | 0              | 0              |
| <i>TRPA1</i> +                                              | 2              | 1              | 0              | 0              |
| <i>TRPM8</i> +                                              | 0              | 3              | 3              | 1              |
| <i>TRPA1</i> + <i>TRPM8</i> +                               | 0              | 0              | 0              | 1              |
| no marker                                                   | 34             | 42             | 51             | 36             |

This table presents the number of DRG neurons expressing individual marker combinations for each individual tissue donor. The most prevalent populations were further characterized. These results are shown in Figure S6.

**Table S12. Neuron population counts for experiment 6 (*TRPV1*, *OPRM1*, *PIEZO2*, *P2RX3*), related to Figure 5.**

|                                                              | <b>Donor 1</b> | <b>Donor 2</b> | <b>Donor 3</b> | <b>Donor 4</b> |
|--------------------------------------------------------------|----------------|----------------|----------------|----------------|
| <i>TRPV1</i> + <i>OPRM1</i> +                                | 10             | 25             | 9              | 15             |
| <i>TRPV1</i> + <i>OPRM1</i> + <i>P2RX3</i> +                 | 68             | 51             | 54             | 56             |
| <i>TRPV1</i> + <i>OPRM1</i> + <i>PIEZO2</i> +                | 1              | 1              | 0              | 4              |
| <i>TRPV1</i> + <i>OPRM1</i> + <i>PIEZO2</i> + <i>P2RX3</i> + | 71             | 92             | 116            | 122            |
| <i>TRPV1</i> +                                               | 0              | 3              | 0              | 1              |
| <i>TRPV1</i> + <i>PIEZO2</i> +                               | 2              | 2              | 6              | 4              |
| <i>TRPV1</i> + <i>P2RX3</i> +                                | 4              | 3              | 2              | 0              |
| <i>TRPV1</i> + <i>PIEZO2</i> + <i>P2RX3</i> +                | 84             | 71             | 77             | 62             |
| <i>OPRM1</i> + <i>PIEZO2</i> +                               | 6              | 1              | 2              | 0              |
| <i>OPRM1</i> + <i>PIEZO2</i> + <i>P2RX3</i> +                | 13             | 7              | 1              | 3              |
| <i>PIEZO2</i> + <i>P2RX3</i> +                               | 2              | 3              | 11             | 4              |
| <i>PIEZO2</i> +                                              | 55             | 46             | 39             | 45             |
| no marker                                                    | 0              | 5              | 5              | 0              |

This table presents the number of DRG neurons expressing individual marker combinations for each individual tissue donor. The most prevalent populations were further characterized. These results are shown in Figure 5.

**Table S13. Neuron population counts for experiment 7 (*TRPV1*, *OPRM1*, *NTRK1*, *GFRA2*), related to Figure 6.**

|                                 | <b>Donor 1</b> | <b>Donor 2</b> | <b>Donor 3</b> | <b>Donor 4</b> |
|---------------------------------|----------------|----------------|----------------|----------------|
| <i>TRPV1+OPRM1+</i>             | 28             | 26             | 42             | 34             |
| <i>TRPV1+OPRM1+NTRK1+</i>       | 153            | 104            | 136            | 141            |
| <i>TRPV1+OPRM1+NTRK1+GFRA2+</i> | 19             | 17             | 7              | 8              |
| <i>TRPV1+OPRM1+GFRA2</i>        | 4              | 2              | 6              | 5              |
| <i>TRPV1+</i>                   | 10             | 8              | 8              | 2              |
| <i>TRPV1+NTRK1+</i>             | 3              | 17             | 8              | 5              |
| <i>TRPV1+GFRA2+</i>             | 67             | 59             | 67             | 82             |
| <i>TRPV1+NTRK1+GFRA2+</i>       | 1              | 2              | 3              | 0              |
| <i>OPRM1+</i>                   | 8              | 1              | 2              | 6              |
| <i>OPRM1+NTRK1+</i>             | 4              | 3              | 9              | 6              |
| <i>OPRM1+GFRA2+</i>             | 0              | 2              | 0              | 0              |
| <i>OPRM1+NTRK1+GFRA2+</i>       | 1              | 0              | 1              | 1              |
| <i>NTRK1+</i>                   | 1              | 1              | 5              | 0              |
| <i>NTRK1+GFRA2+</i>             | 1              | 0              | 0              | 0              |
| <i>GFRA2+</i>                   | 5              | 23             | 12             | 4              |
| no marker                       | 32             | 44             | 16             | 36             |

This table presents the number of DRG neurons expressing individual marker combinations for each individual tissue donor. The most prevalent populations were further characterized. These results are shown in Figure 6.

**Table S14. Neuron population counts for experiment 8 (*TRPV1*, *OPRM1*, *GFRA2*, *MRGPRD*), related to Figure 6.**

|                                  | <b>Donor 1</b> | <b>Donor 2</b> | <b>Donor 3</b> | <b>Donor 4</b> |
|----------------------------------|----------------|----------------|----------------|----------------|
| <i>TRPV1+OPRM1+</i>              | 156            | 171            | 188            | 159            |
| <i>TRPV1+OPRM1+GFRA2+</i>        | 8              | 3              | 20             | 16             |
| <i>TRPV1+OPRM1+MRGPRD+</i>       | 0              | 3              | 0              | 8              |
| <i>TRPV1+OPRM1+GFRA2+MRGPRD+</i> | 0              | 1              | 0              | 3              |
| <i>TRPV1+</i>                    | 6              | 12             | 9              | 9              |
| <i>TRPV1+GFRA2+</i>              | 13             | 31             | 14             | 13             |
| <i>TRPV1+MRGPRD+</i>             | 3              | 0              | 0              | 0              |
| <i>TRPV1+GFRA2+MRGPRD+</i>       | 89             | 30             | 60             | 54             |
| <i>OPRM1+</i>                    | 3              | 8              | 1              | 10             |
| <i>OPRM1+GFRA2+</i>              | 7              | 0              | 1              | 5              |
| <i>GFRA2+</i>                    | 6              | 1              | 7              | 27             |
| no marker                        | 34             | 55             | 9              | 18             |

This table presents the number of DRG neurons expressing individual marker combinations for each individual tissue donor. The most prevalent populations were further characterized. These results are shown in Figure 6.

**Table S15. Clinical trials involving agonists to non- $\mu$ -opioid receptors, related to Figure 1 and Discussion.**

| Drug name               | Action                                                         | Clinical trial # | Phase   | Clinical indication                                     | Status          |
|-------------------------|----------------------------------------------------------------|------------------|---------|---------------------------------------------------------|-----------------|
| ADL5859                 | selective nonpeptide $\delta$ -opioid receptor agonist         | NCT00993863      | Phase 2 | Acute pain after third molar extraction                 | completed 2007  |
| ADL5859                 | selective nonpeptide $\delta$ -opioid receptor agonist         | NCT00626275      | Phase 2 | Pain from rheumatoid arthritis                          | completed 2008  |
| ADL5859                 | selective nonpeptide $\delta$ -opioid receptor agonist         | NCT00603265      | Phase 2 | Pain from diabetic peripheral neuropathy                | completed 2008  |
| ADL5859                 | selective nonpeptide $\delta$ -opioid receptor agonist         | NCT00979953      | Phase 2 | Pain from knee osteoarthritis                           | completed 2010  |
| ADL5747                 | selective nonpeptide delta agonist                             | NCT00979953      | Phase 2 | Pain from knee osteoarthritis                           | completed 2010  |
| ADL5747                 | selective nonpeptide $\delta$ -opioid receptor agonist         | NCT01058642      | Phase 2 | Pain from postherpetic neuralgia                        | terminated 2010 |
| NP2                     | gene-transfer vector for proenkephalin                         | NCT01291901      | Phase 2 | Intractable cancer pain                                 | completed 2013  |
| Asimadoline (EMD 61753) | second-generation peripheral $\kappa$ -opioid receptor agonist | NCT00454688      | Phase 2 | Pain from inflammatory bowel syndrome                   | completed 2007  |
| Asimadoline (EMD 61753) | second-generation peripheral $\kappa$ -opioid receptor agonist | NCT00955994      | Phase 2 | Pain from inflammatory bowel syndrome                   | completed 2007  |
| Asimadoline (EMD 61753) | second-generation peripheral $\kappa$ -opioid receptor agonist | NCT00443040      | Phase 2 | Ileus after colon resections                            | completed 2008  |
| Asimadoline (EMD 61753) | second-generation peripheral $\kappa$ -opioid receptor agonist | NCT01100684      | Phase 3 | Pain from diarrhea dominant inflammatory bowel syndrome | completed 2013  |
| Asimadoline (EMD 61753) | second-generation peripheral $\kappa$ -opioid receptor agonist | NCT02475447      | Phase 2 | Pruritus from atopic dermatitis                         | completed 2017  |
| Difelikefalin (CR845)   | third-generation peripheral $\kappa$ -opioid receptor agonist  | NCT00877799      | Phase 2 | Post-hysterectomy pain                                  | completed 2010  |
| Difelikefalin (CR845)   | third-generation peripheral $\kappa$ -opioid receptor agonist  | NCT01361568      | Phase 2 | Post-hysterectomy pain                                  | completed 2012  |
| Difelikefalin (CR845)   | third-generation peripheral $\kappa$ -opioid receptor agonist  | NCT01789476      | Phase 2 | Post-bunionectomy pain                                  | completed 2013  |
| Difelikefalin (CR845)   | third-generation peripheral $\kappa$ -opioid receptor agonist  | NCT02524197      | Phase 2 | Pain from knee or hip osteoarthritis                    | completed 2016  |
| Difelikefalin (CR845)   | third-generation peripheral $\kappa$ -opioid receptor agonist  | NCT02944448      | Phase 2 | Pain from knee or hip osteoarthritis                    | completed 2017  |

|                       |                                                                                                                             |             |                 |                                                                 |                                      |
|-----------------------|-----------------------------------------------------------------------------------------------------------------------------|-------------|-----------------|-----------------------------------------------------------------|--------------------------------------|
| Difelikefalin (CR845) | third-generation peripheral $\kappa$ -opioid receptor agonist                                                               | NCT02542384 | Phase 2/Phase 3 | Post-abdominal surgery pain                                     | completed 2018                       |
| Difelikefalin (CR845) | third-generation peripheral $\kappa$ -opioid receptor agonist                                                               | NCT03636269 | Phase 3         | Pruritus in hemodialysis patients                               | completed 2020, approved by FDA 2021 |
| Difelikefalin (CR845) | third-generation peripheral $\kappa$ -opioid receptor agonist                                                               | NCT03422653 | Phase 3         | Pruritus in hemodialysis patients                               | completed 2020, approved by FDA 2021 |
| Difelikefalin (CR845) | third-generation peripheral $\kappa$ -opioid receptor agonist                                                               | NCT04018027 | Phase 2         | Pruritus in atopic dermatitis                                   | completed 2021                       |
| Difelikefalin (CR845) | third-generation peripheral $\kappa$ -opioid receptor agonist                                                               | NCT04706975 | Phase 2         | Pruritus in notalgia paresthetica                               | completed 2022                       |
| Difelikefalin (CR845) | third-generation peripheral $\kappa$ -opioid receptor agonist                                                               | NCT03995212 | Phase 2         | Pruritus in primary biliary cholangitis                         | terminated 2022                      |
| Difelikefalin (CR845) | third-generation peripheral $\kappa$ -opioid receptor agonist                                                               | NCT05356403 | Phase 3         | Pruritus in chronic kidney disease without dialysis             | terminated 2024                      |
| Difelikefalin (CR845) | third-generation peripheral $\kappa$ -opioid receptor agonist                                                               | NCT05387707 | Phase 3         | Adjunct to topical corticoids for pruritus in atopic dermatitis | terminated 2024                      |
| Cebranopadol          | full agonist on $\mu$ - and $\delta$ -opioid receptor, partial agonist on nociceptin-receptor and $\kappa$ -opioid receptor | NCT01964378 | Phase 3         | Chronic moderate to severe pain related to cancer               | completed 2015                       |
| Cebranopadol          | full agonist on $\mu$ - and $\delta$ -opioid receptor, partial agonist on nociceptin-receptor and $\kappa$ -opioid receptor | NCT01939366 | Phase 3         | diabetic neuropathy                                             | completed 2015                       |

Multiple entries of certain agents tested in clinical trials presumably reflect a developmental evolution of compounds that initially began as analgesics.

**Table S16. Human donor information, related to Methods.**

| Donor No. | Gender | Age | Cause of death             | Medical conditions                    | Retrieval time (h:min) |
|-----------|--------|-----|----------------------------|---------------------------------------|------------------------|
| 1         | M      | 27  | CVA / ICH / Stroke         | N/A                                   | 3:16                   |
| 2         | F      | 21  | Anoxia / Drug Intoxication | Seizures, Bipolar, difficulty walking | 2:02                   |
| 3         | F      | 22  | Anoxia / Drug Intoxication | N/A                                   | 8:12                   |
| 4         | M      | 20  | CVA / ICH / Stroke         | N/A                                   | 3:10                   |

**Table S17. Advanced Cell Diagnostics (ACD) RNAscope probes, related to Methods.**

| <b>mRNA</b>   | <b>Gene name</b>                                                 | <b>ACD Cat No.</b>                 |
|---------------|------------------------------------------------------------------|------------------------------------|
| <i>GFRA2</i>  | GDNF Family Receptor Alpha 2                                     | 463011                             |
| <i>MRGPRD</i> | MAS Related GPR Family Member D                                  | 524871                             |
| <i>NTRK1</i>  | Neurotrophic Receptor Tyrosine Kinase 1                          | 402631                             |
| <i>OPRD1</i>  | opioid receptor delta 1                                          | 536061                             |
| <i>OPRK1</i>  | opioid receptor kappa 1                                          | 1148211                            |
| <i>OPRK1</i>  | opioid receptor kappa 1                                          | 1148211-O1<br>(custom 13 ZZ probe) |
| <i>OPRL1</i>  | opioid related nociceptin receptor 1                             | 536071                             |
| <i>OPRM1</i>  | opioid receptor mu 1                                             | 410681                             |
| <i>PIEZO2</i> | piezo type mechanosensitive ion channel component 2              | 449951                             |
| <i>P2RX3</i>  | purinergic receptor P2X 3                                        | 406301                             |
| <i>SCN10A</i> | sodium voltage-gated channel alpha subunit 10                    | 406291                             |
| <i>SCN11A</i> | sodium voltage-gated channel alpha subunit 11                    | 404791                             |
| <i>SPP1</i>   | secreted phosphoprotein 1                                        | 420101                             |
| <i>TAC1</i>   | tachykinin precursor 1                                           | 310711                             |
| <i>TRPA1</i>  | transient receptor potential cation channel subfamily A member 1 | 503741                             |
| <i>TRPM8</i>  | transient receptor potential cation channel subfamily M member 8 | 543121                             |
| <i>TRPV1</i>  | Transient receptor potential cation channel subfamily V member 1 | 415381                             |

**Table S18. Fluorophores for TSA-RNAscope V2 imaging, related to Methods.**

| <b>Fluorophore</b> | <b>Exciter</b> | <b>Dichroic</b> | <b>Emitter</b> |
|--------------------|----------------|-----------------|----------------|
| DAPI               | FF01-340/26    | FF458-Di02      | FF01-482/25    |
| Opal 520           | FF01-494/20    | FF506-Di03      | FF01-527/20    |
| Opal 570           | FF01-535/22    | FF560-Di01      | FF01-580/23    |
| Opal 620           | FF01-586/20    | FF605-Di02      | FF01-628/32    |
| Opal 690           | FF01-680/22    | FF705-Di01      | FF01-720/13    |

**Figure S1. Puncta counts and signal intensities correlate, despite variability in puncta brightness, related to Methods.**

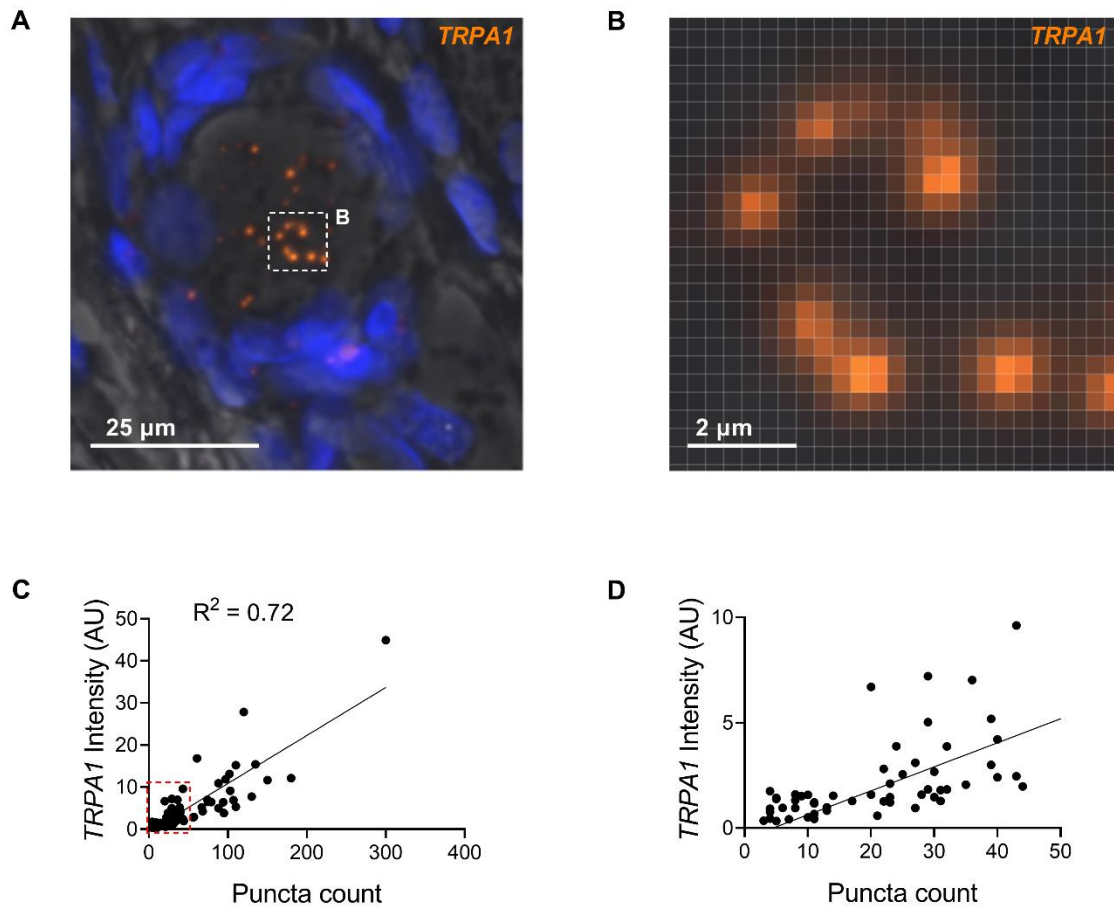

(A) Representative neuron expressing *TRPA1* (see also Figure S6). Each puncta represents a mRNA. Signal was enhanced for visibility. Tissue was visualized with differential interference contrast (DIC) imaging. (B) Pixel-level resolution of *TRPA1* puncta shown in white square in (A). Note the dimensions of puncta (at least  $2 \times 2$  pixel, or  $0.67 \times 0.67 \mu\text{m}$ ). Due to the TSA amplification puncta can vary in brightness and size. (C) Correlation between puncta count and signal intensity (mean grey scale as calculated by Fiji). 80 neurons were included in the analysis ( $n=20$  neurons from each donor). Puncta count and signal intensity show a strong correlation, despite the variation in puncta brightness and size. (D) Data shown in (C), restricted to puncta counts  $n \leq 50$ .

**Figure S2. Regions of Interest (ROIs) to measure neuronal cell size, transcript signal intensity, and signal bleed, related to Methods.**

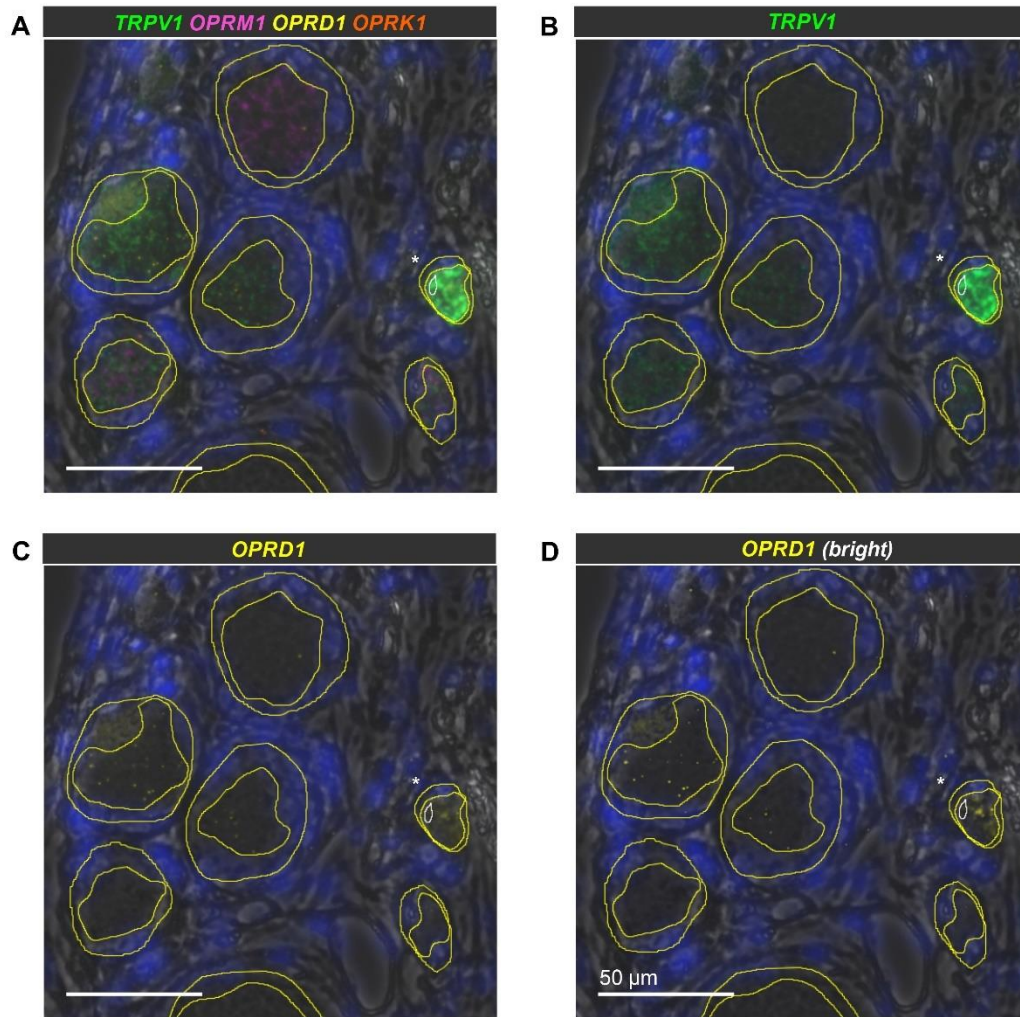

(A) Representative section of human DRG showing positive transcripts for *TRPV1*, *OPRM1*, *OPRD1*, and *OPRK1* in a multichannel overlay (experiment 1, unmanipulated signal). (B) Window showing transcripts for *TRPV1* (unmanipulated signal). Window showing transcripts for *OPRD1* with unmanipulated signal (C) and signal that was adjusted for brightness and contrast for visibility (D). Outer yellow circles represent ROIs to determine neuronal cells size and inner yellow circles ROIs to calculate transcript expression intensity (following the cytoplasm outline and excluding lipofuscin). In case signal bleed was visually detected (here from *TRPV1* (green, 488 nm channel) to *OPRD1* (yellow, 456 nm channel) in the neuron marked with an asterisk), we used the bleed signal intensity of a separate ROI capturing bleed signal (white circle) for correction. Tissue was visualized with differential interference contrast (DIC) imaging.



**Figure S3. Percentage of *TRPV1+OPRM1+* nociceptors across experiments and percentage of *TRPV1+OPRM1+* nociceptors across experiments stratified by gender, related to Figure 1.**

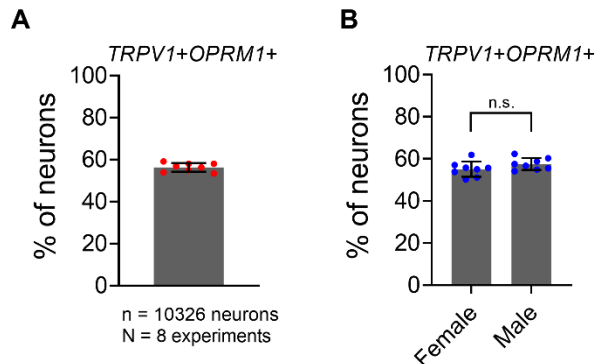

(A) Percentage of neurons showing transcripts for both *TRPV1* and *OPRM1* across all in situ hybridization experiments (N=8 experiments). Bar graph represents mean percentage of *TRPV1+OPRM1+* neurons of all experiments and all donors, error bars represent standard deviation, and dots show mean percentage of *TRPV1+OPRM1+* neurons for all donors per individual experiment ( $\bar{x}=56.3\pm 2.1\%$ ). (B) Percentage of *TRPV1+OPRM1+* neurons across all in situ hybridization experiments (N=8 experiments) stratified by gender ( $\bar{x}=55.1\pm 3.6\%$  for Females,  $\bar{x}=57.5\pm 2.8\%$  for Males). We did not detect a gender difference for the prevalence of *TRPV1+OPRM1+* nociceptors ( $p=0.2$ , Mann-Whitney U test). The small sample of tissue donors and the fact that both female donors died of a drug overdose, as opposed to the two male tissue donors, limits the interpretation of this result. Bar graphs represent mean percentage of *TRPV1+OPRM1+* neurons of all experiments and gender-stratified donors (2 Females, 2 Males), error bars represent standard deviations, and dots show mean percentage of *TRPV1+OPRM1+* neurons per individual experiment for donors stratified by gender.

**Figure S4. Neuronal subpopulations expressing *OPRK1*, related to Figure 1.**

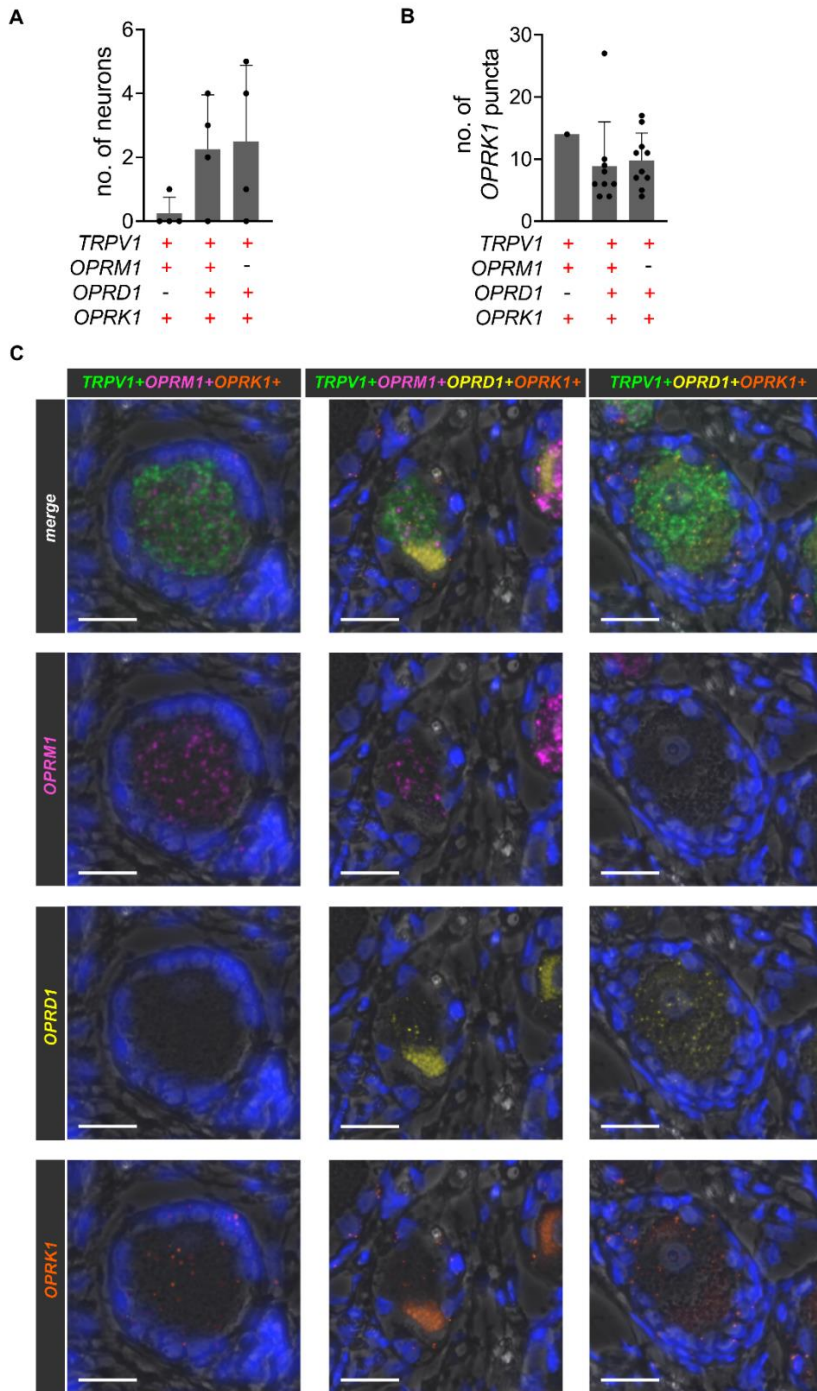

(A) We detected transcripts for *OPRK1* in 20/1280 neurons. All *OPRK1*-expressing neurons co-expressed *TRPV1* and transcripts for at least one other opioid receptor. Bar graphs demonstrate mean counts, standard deviation and individual counts for each donor. (B) *OPRK1* puncta counts for each *OPRK1*-expressing subpopulation. *OPRK1* was expressed in a low fashion in those neurons, with 13/20 neurons expressing 10 transcripts or less. (C) Representative neuron of each subpopulation shown in an overlay and individual channels for each opioid-receptor transcript. Signal was adjusted for brightness and contrast for visibility. Tissue was visualized with differential interference contrast (DIC) imaging. Scale bars represent 25  $\mu$ m.

**Figure S5. Spatial overlap of transcripts for *OPRK1* as detected with the custom and standard probe, respectively, related to Figure 1.**

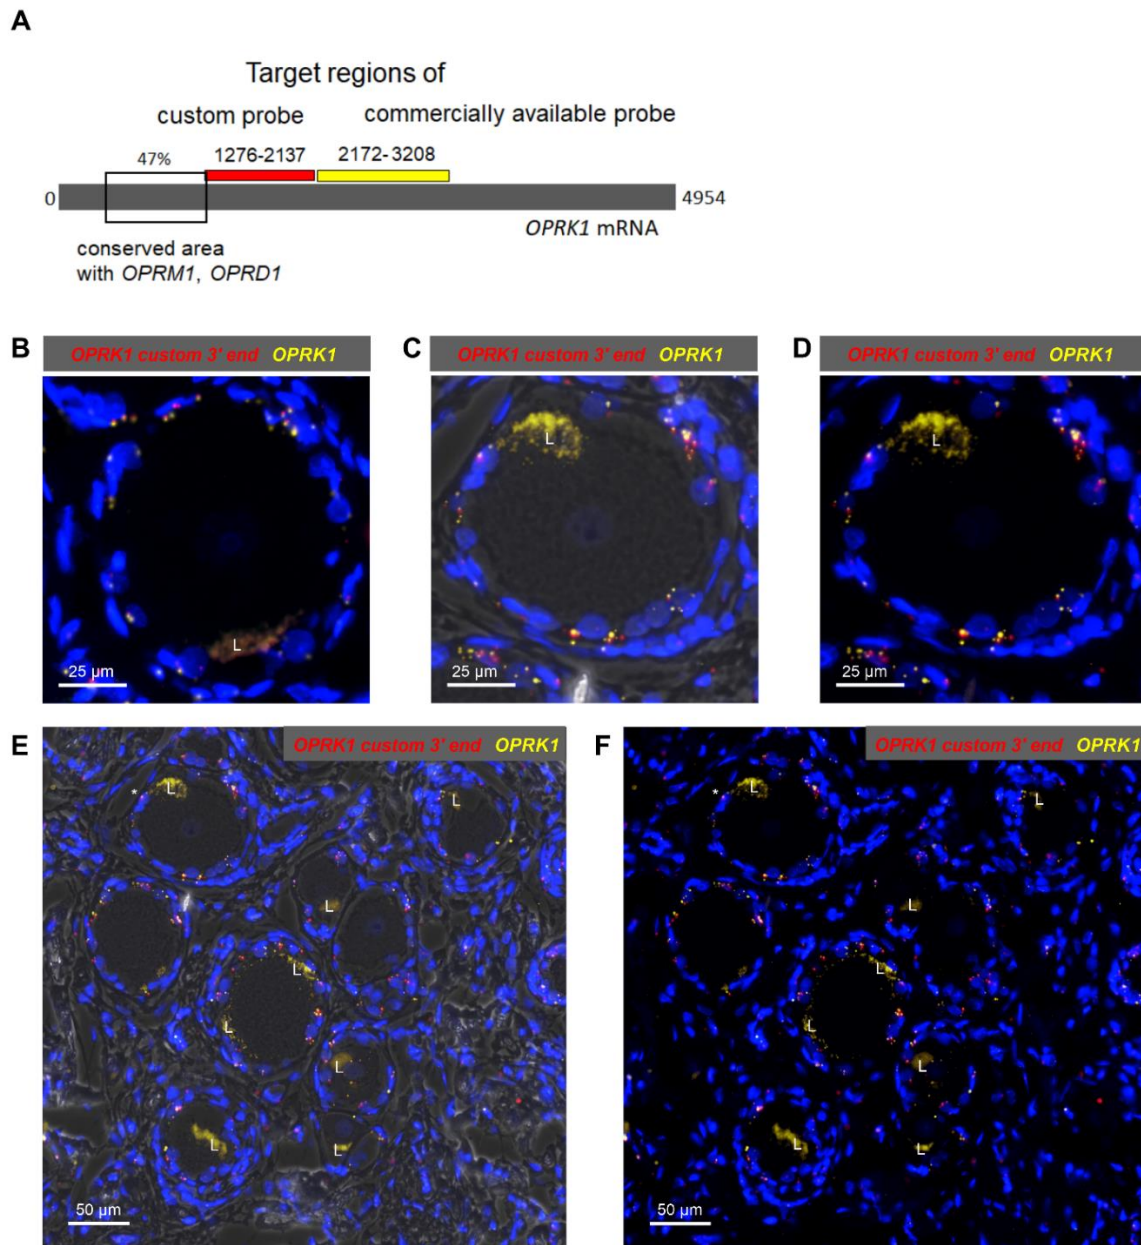

(A) Schematic illustration of the *OPRK1* transcript and target areas for the custom probe (red) and the commercially available probe (yellow). Note that the target areas for both probes do not overlap. The custom probes are not predicted to cross react with other isoforms based on sequence differences between the target regions. Note that this is also confirmed empirically in co-labeling studies. (B) Same single neuron as shown in Figure 1F). (C) and (D) Example of a single neuron (marked by an asterisk in (E) and (F)). (E) and (F) Representative windows showing a larger field. (C) and (E) include tissue visualized with differential interference contrast (DIC) imaging. Transcripts for *OPRK1* as detected with the custom probe are illustrated in red, and with the standard probe in yellow. Lipofuscin is marked with an “L”.

**Figure S6. *OPRM1*-positive nociceptors express *TRPM8*, related to Figure 7 and Results.**

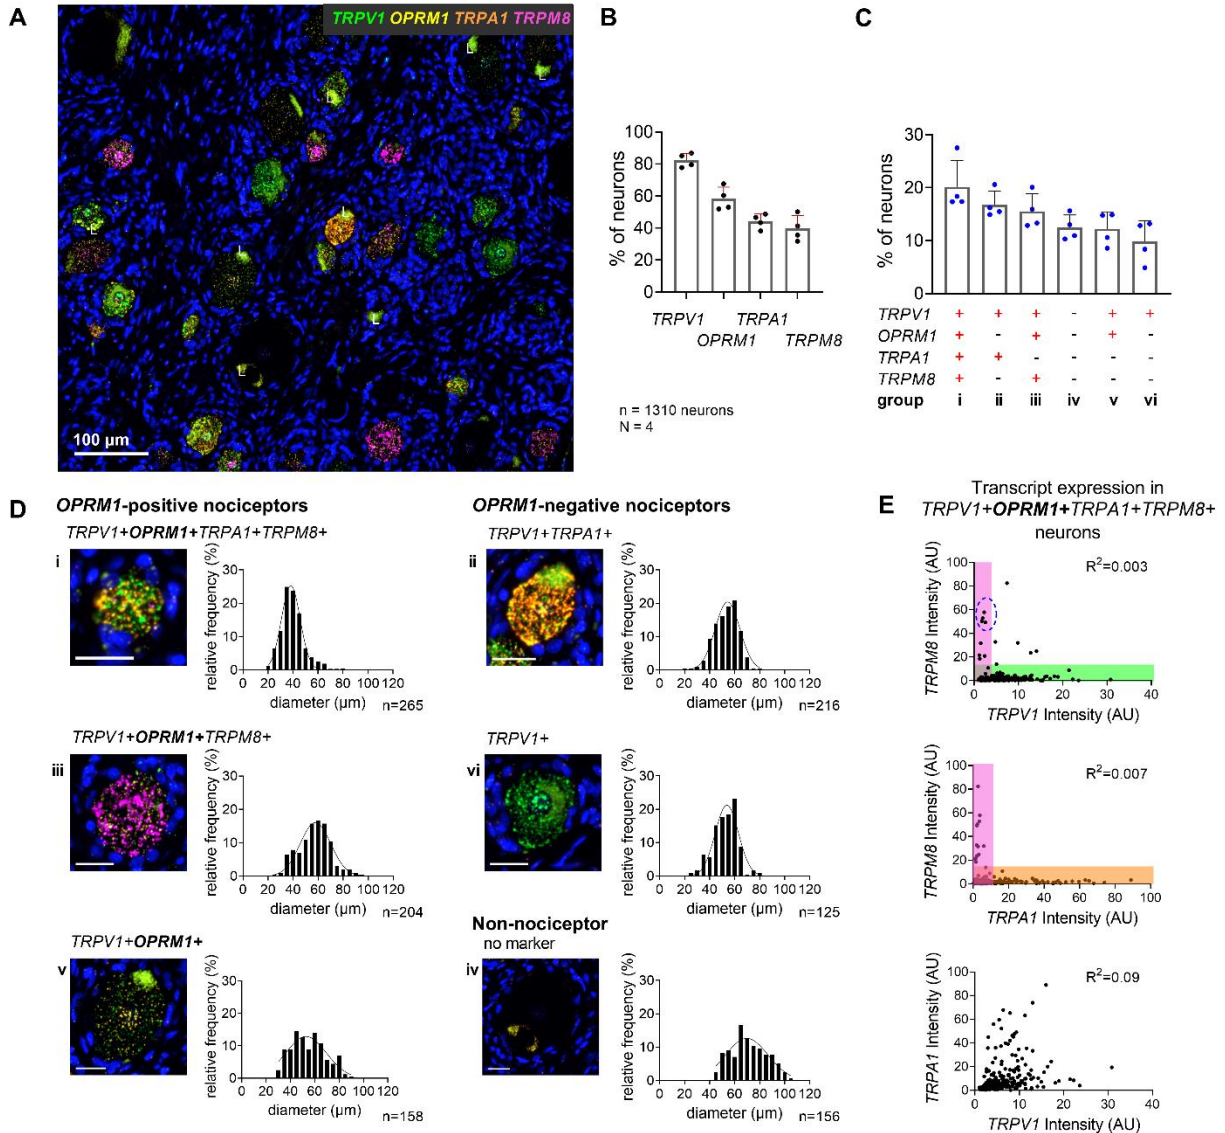

(A) Representative section of human DRG showing neurons expressing transcripts for TRPV1, the  $\mu$ -opioid receptor (*OPRM1*), the chemo-sensitive receptor TRPA1 and the cold-sensitive receptor TRPM8. (B) Percentage of 1,310 neurons expressing each individual transcript. (C) Percentage of neurons expressing the most common transcript combinations. Bar graphs in (B) and (C) show mean, SD, and individual values from all four donors. (D) Multi-channel microscopy images of a representative individual neuron of each population and the population's cell size distribution. Scale bars = 25  $\mu\text{m}$ . Lipofuscin is marked with an "L". (E) Correlation analyses for expression intensities of the transient receptor channels in the quad+ population i. While there is co-expression for all transcripts within this population, the high-*TRPM8* expressing subpopulation expresses low *TRPV1* and *TRPA1*, indicating a distinct population of strongly cold-responsive neurons (blue oval). The small-diameter *TRPV1+OPRM1+TRPA1+TRPM8+* quad+ population identified in experiment 4 (Figure 4Eii) is a multimodal, highly noci-responsive population that overlaps with the quad+ population in this experiment. The detection of *TRPM8* expression contributes the sensation of cold in this population.

**Figure S7. Classification of *TRPV1+OPRM1+* nociceptors and *TRPV1+OPRM1-* nociceptors into C- and A-nociceptors, related to Figure 7.**

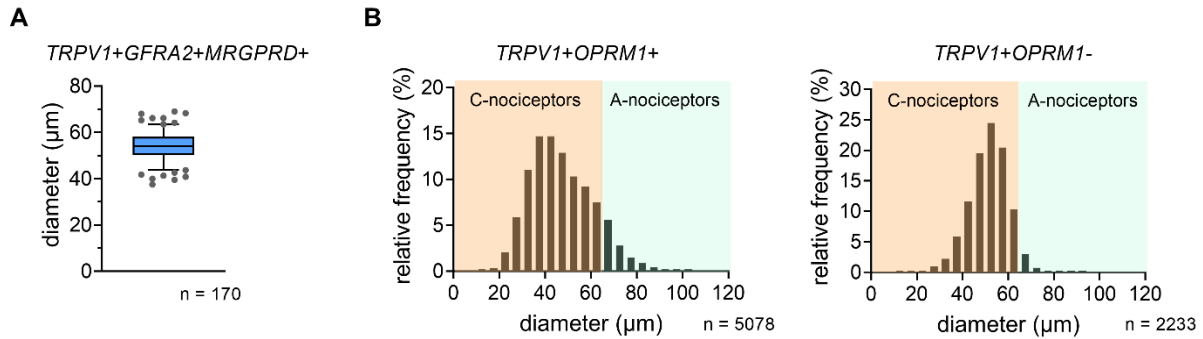

(A) Box plot of neuronal diameter for the molecularly defined *TRPV1+GFRA2+MRGPRD+* C-nociceptive population (see Figure 7I).<sup>[S41,42]</sup> Whiskers represent 5<sup>th</sup> ( $x=43.8 \mu\text{m}$ ) and 95<sup>th</sup> ( $x=63.3 \mu\text{m}$ ) percentile, respectively. Single dots represent data points beyond the 5<sup>th</sup> and 95<sup>th</sup> percentile. (B) Histograms of *TRPV1+OPRM1+* and *TRPV1+OPRM1-* nociceptors. Based on the cell size distribution of *TRPV1+GFRA2+MRGPRD+* neurons in (A,) which are a subpopulation of *TRPV1+OPRM1-* neurons, we estimated that neurons with a cell diameter  $\leq 65 \mu\text{m}$  likely represent C-nociceptors, and those with a cell diameter  $> 65 \mu\text{m}$  likely represent A-nociceptors.

**Figure S8. Comparison of human DRG in situ hybridization results from this study with spatial transcriptomic data; related to Figure 1 and Discussion.**

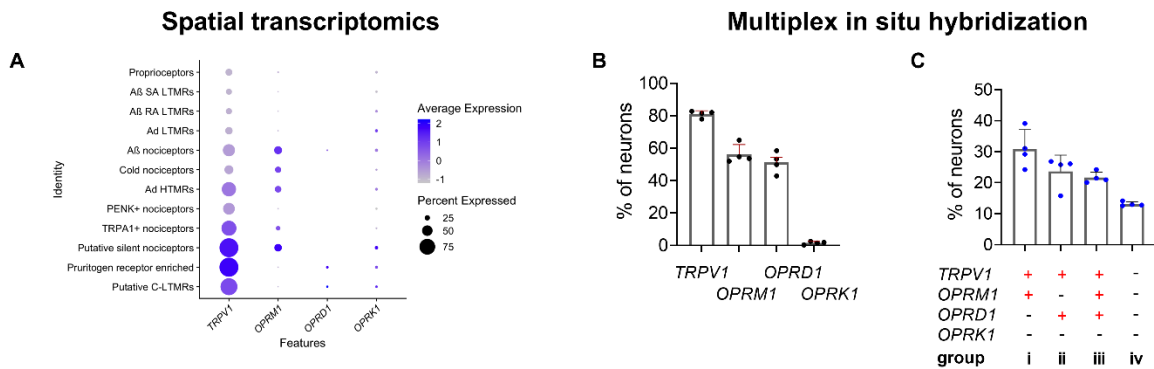

(A) Dot plots demonstrating gene expression in different clusters as provided by spatial transcriptomics study.<sup>[S43]</sup> (B) Percentage of neurons expressing each individual gene and (C) percentage of neurons expressing the most common transcript combinations. In (A), note that the expression of *OPRM1* is not unambiguously described, that a co-expression with *OPRD1* in some populations of nociceptors is not detected, and that *OPRK1* is expressed in all populations. These findings are overly inclusive compared to the discrete co-expression patterns obtained with our methodology. We show co-expression of *OPRM1* with *OPRD1* in a subgroup of *TRPV1+OPRM1+* nociceptors and that *OPRK1* was hardly expressed by DRG neurons, but broadly by satellite glial cells (Figures 1F, S4, S5). It is notable, that both *OPRD1* and *OPRK1* exhibit low transcript levels, which may be one reason why they are prone to drop-out in sc/sn sequencing and/or misclassification in spatial transcriptomics.

**Figure S9. Comparison of human DRG in situ hybridization results from this study with spatial transcriptomic data; related to Figure 2 and Discussion.**

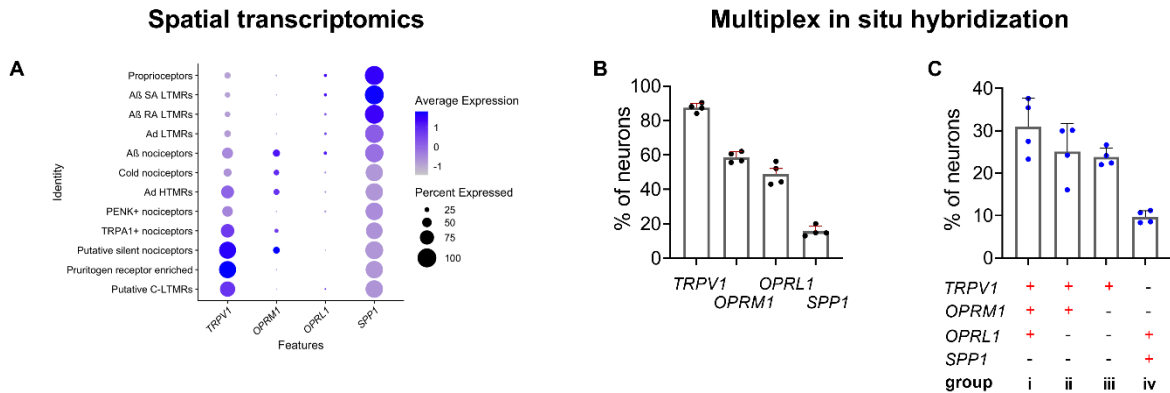

(A) Dot plots demonstrating gene expression in different clusters as provided by spatial transcriptomics study.<sup>[S43]</sup> (B) Percentage of neurons expressing each individual gene and (C) percentage of neurons expressing the most common transcript combinations. Note that genes with low expression levels, such as *OPRM1* and *OPRL1*, as well as *SPP1*, a gene with a high expression level, are not unambiguously assigned to distinct clusters. This is in contrast to our in situ hybridization results, which show *OPRL1* expression in a subpopulation of *TRPV1+OPRM1+* nociceptors, and in a defined, small population of *SPP1+* neurons. In the spatial transcriptomics dataset, *SPP1* appears to be expressed in all clusters compared to the more discrete population seen with in situ hybridization.

**Figure S10. Comparison of human DRG in situ hybridization results from this study with spatial transcriptomic data; related to Figure 3 and Discussion.**

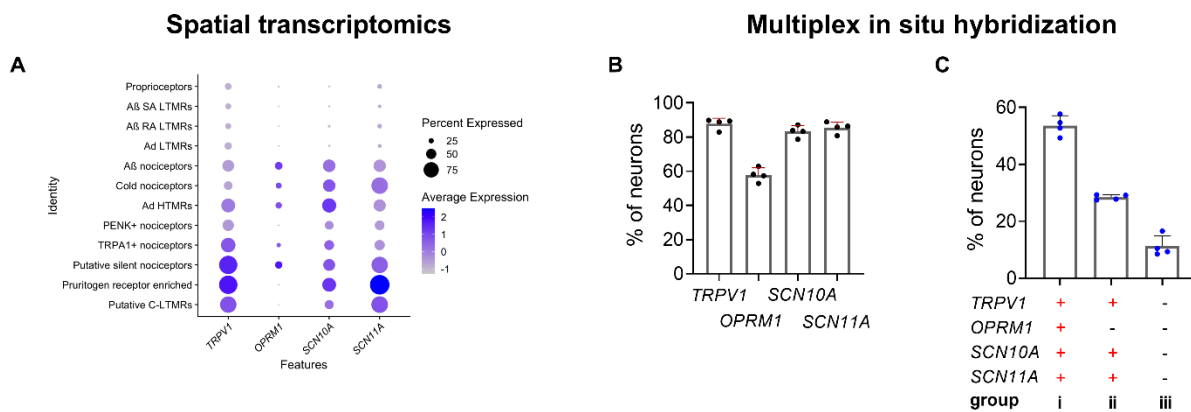

(A) Dot plots demonstrating gene expression in different clusters as provided by spatial transcriptomics study.<sup>[S43]</sup> (B) Percentage of neurons expressing each individual gene and (C) percentage of neurons expressing the most common transcript combinations. Note that we confirmed the co-expression of *SCN10A* and *SCN11A* in nociceptors (though spatial transcriptomics implies a small percentage of expression in non-nociceptive clusters). Spatial transcriptomics reveal the highest expression level for *SCN11A* in the pruritogen receptor enriched cluster, which aligns with high expression of *SCN11A* in the *TRPV1+OPRM1-* populations (Figure 3). According to spatial transcriptomics data, a small percentage of the pruritogen receptor enriched cluster seem to express *OPRM1*, which is not evident in our results.

**Figure S11. Comparison of human DRG in situ hybridization results from this study with spatial transcriptomic data; related to Figure 4 and Discussion.**

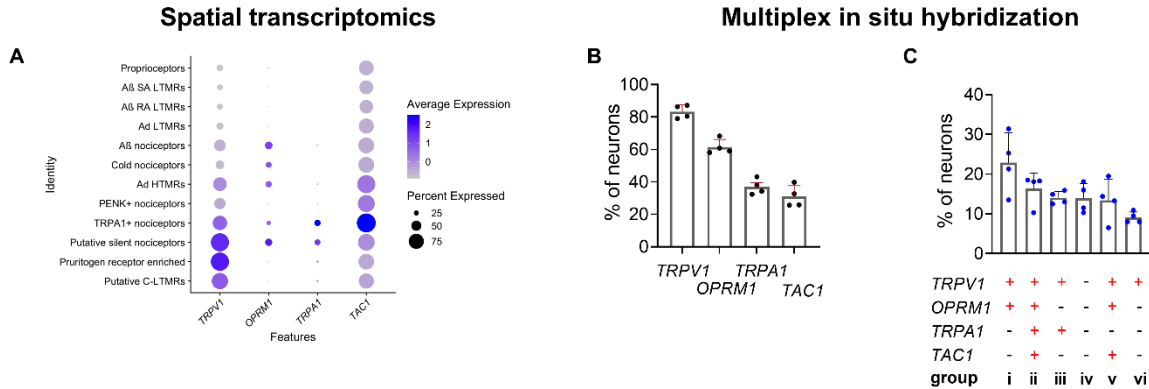

(A) Dot plots demonstrating gene expression in different clusters as provided by spatial transcriptomics study.<sup>[S43]</sup> (B) Percentage of neurons expressing each individual gene and (C) percentage of neurons expressing the most common transcript combinations. We detected *TRPA1* in more neurons than was detected with spatial transcriptomics. We observed it significantly expressed by a subgroup of *TRPV1+OPRM1-* nociceptors, which potentially corresponds to the pruritogen receptor enriched cluster. In this cluster, *TRPA1* is hardly detected. Another discrepancy is the expression of *TAC1*, which, while focused in the *TRPA1* nociceptor population in (A), is detected in every cluster. This contrasts with the two distinct populations detected with in situ hybridization.

**Figure S12. Comparison of human DRG in situ hybridization results from this study with spatial transcriptomic data; related to Figure 7, Figure S6 and Discussion.**

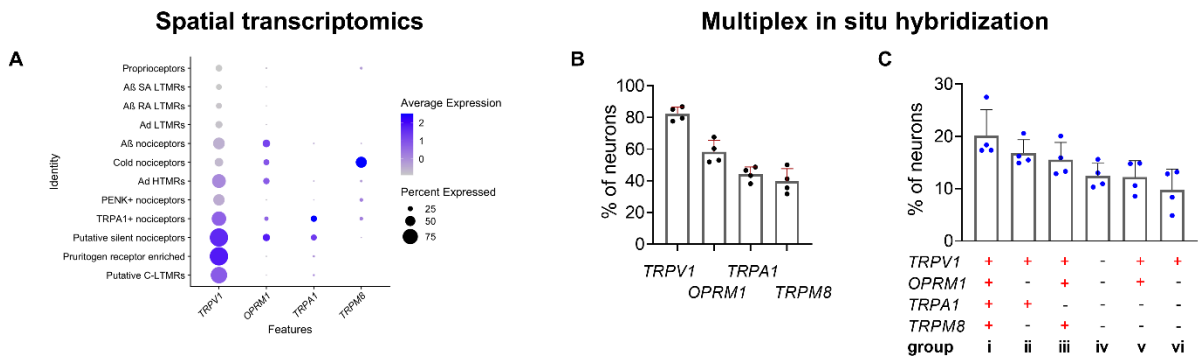

(A) Dot plots demonstrating gene expression in different clusters as provided by spatial transcriptomics (ST) study.<sup>[S43]</sup> (B) Percentage of neurons expressing each individual gene and (C) percentage of neurons expressing the most common transcript combinations. For *TRPA1*, again we detected, expression in more neurons than was apparent with spatial transcriptomics. We observed *TRPA1* to be significantly expressed by a subgroup of *TRPV1+OPRM1-* nociceptors, which potentially corresponds to the “pruritogen receptor enriched” cluster. In this cluster, *TRPA1* is hardly detected. We classified this cluster as being contained within *TRPV1+OPRM1-* nociceptors. Also, *TRPA1* is expressed in the *TRPV1+OPRM1+* population (C). *TRPM8* was expressed in *TRPV1+OPRM1+* nociceptors, which matches ST results (Figure S6).

**Figure S13. Comparison of human DRG in situ hybridization results from this study with spatial transcriptomic data; related to Figure 5 and Discussion.**

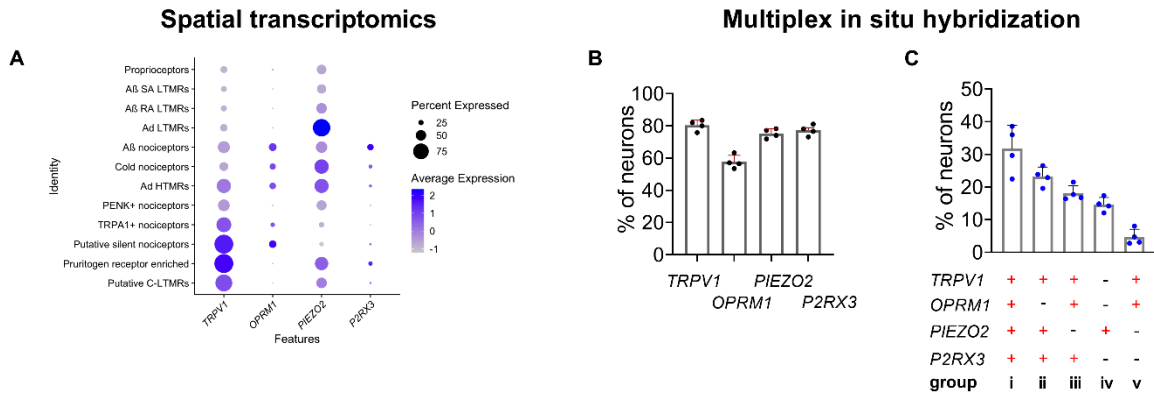

(A) Dot plots demonstrating gene expression in different clusters as provided by spatial transcriptomics (ST) study.<sup>[S43]</sup> (B) Percentage of neurons expressing each individual gene and (C) percentage of neurons expressing the most common transcript combinations. In contrast to the ST dataset, transcripts for *P2RX3* were detected in an abundance of neurons with in situ hybridization. The result that basically all *TRPV1+OPRM1-* neurons (potentially corresponding to the “pruritogen receptor enriched” cluster) express *PIEZO2* and *P2RX3* (Figure 5) cannot be accurately derived from the ST data.

**Figure S14. Comparison of human DRG in situ hybridization results from this study with spatial transcriptomic data; related to Figure 6 and Discussion.**

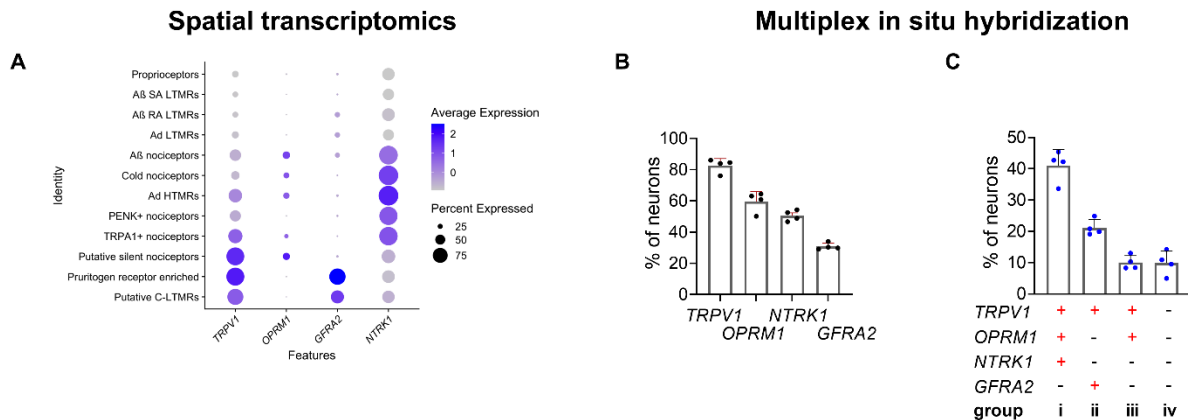

(A) Dot plots demonstrating gene expression in different clusters as provided by spatial transcriptomics (ST) study.<sup>[S43]</sup> (B) Percentage of neurons expressing each individual gene and (C) percentage of neurons expressing the most common transcript combinations. In the ST dataset, *NTRK1* appears to be expressed in all clusters. This is not supported by the selective expression of *NTRK1* in *TRPV1+OPRM1+* nociceptors. A robust expression of *GFRA2* by *TRPV1+OPRM1-* nociceptors (most likely corresponding to the “pruritogen receptor enriched” cluster) matches results from the ST study presented here.



**Figure S15. Comparison of human DRG in situ hybridization results from this study with spatial transcriptomic data; related to Figure 6 and Discussion.**

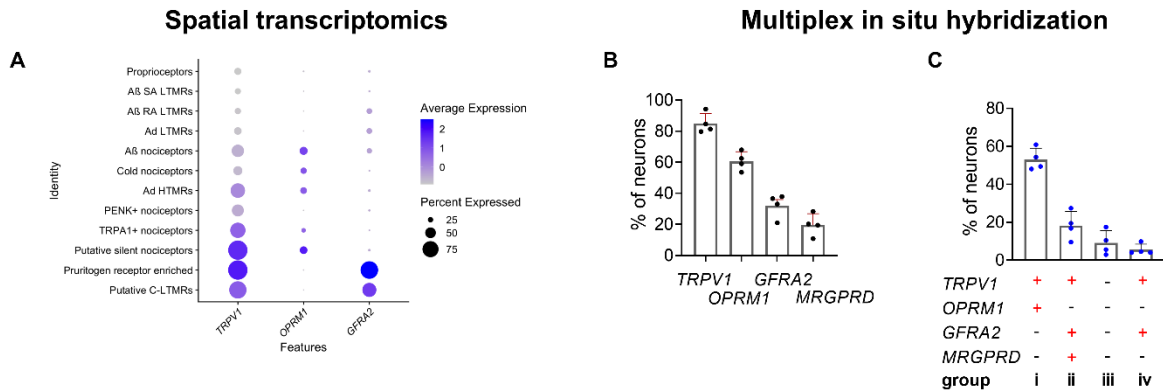

(A) Dot plots demonstrating gene expression in different clusters as provided by spatial transcriptomics (ST) study.<sup>[S43]</sup> (B) Percentage of neurons expressing each individual gene and (C) percentage of neurons expressing the most common transcript combinations. Note that *MRGPRD*, which is expressed by a major subgroup of *TRPV1+OPRM1-GFRA2+* nociceptors, is not represented in the ST database due to its low expression levels.

**Figure S16. UMAP plots derived from spatial transcriptomics study of all gene transcripts investigated in this study, related to Figure 7 and Discussion.**

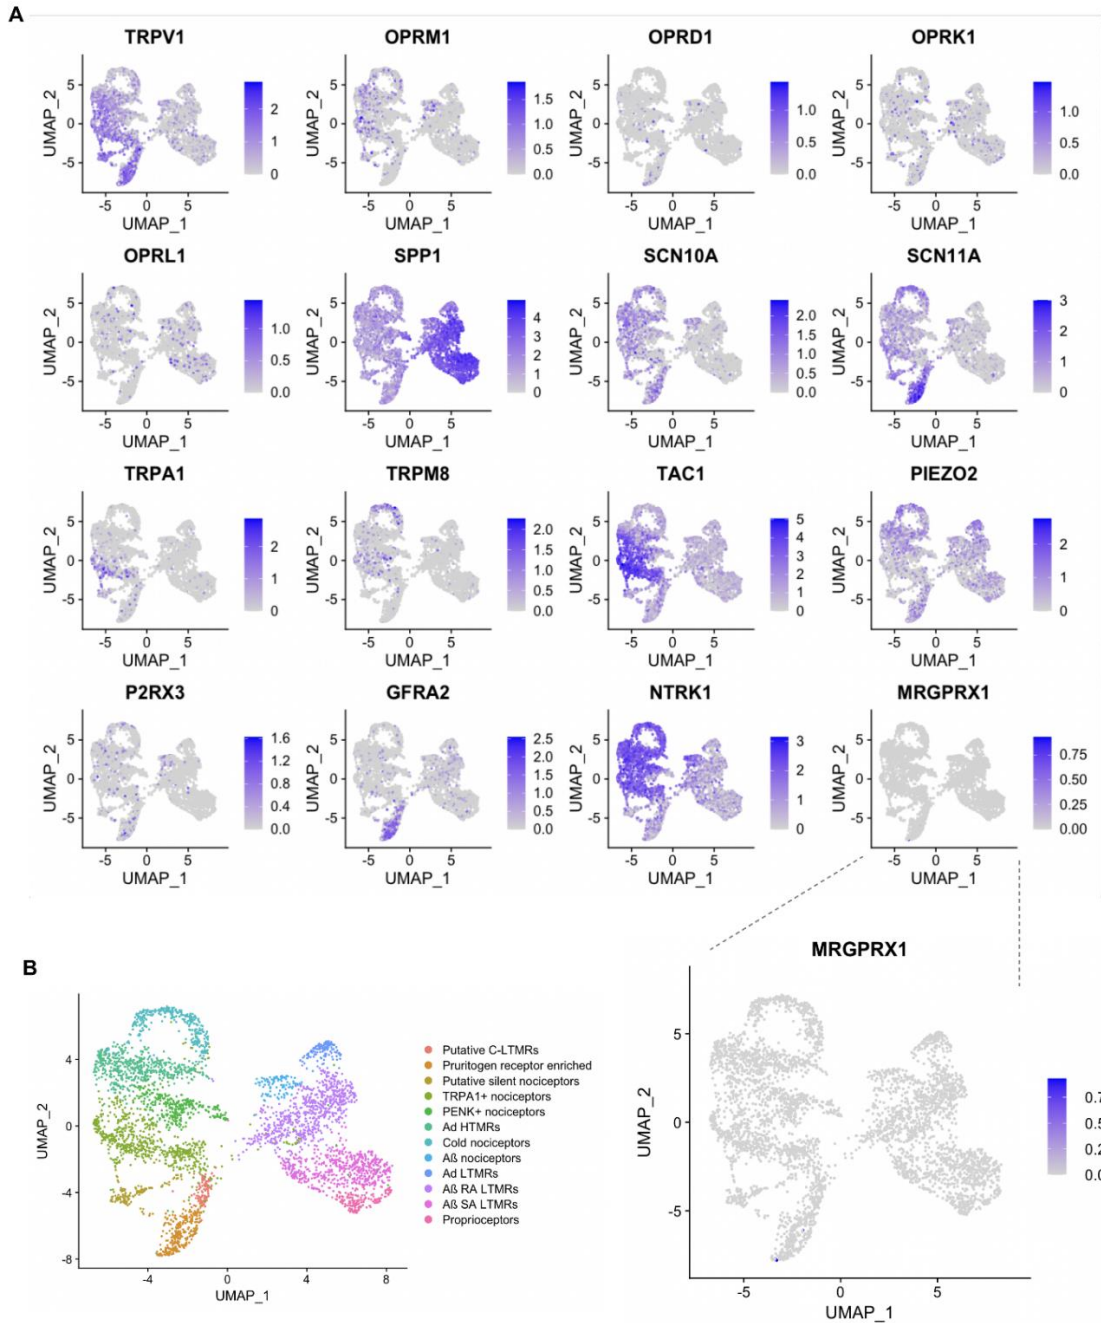

(A) UMAP plots of all genes investigated in this study. Instead of *MRGPRD*, which is not represented in this dataset, we show the highly co-expressed gene *MRGPRX1*.<sup>[S44]</sup> Note the sparse representation of *MRGPRX1* in the enlarged plot. (B) UMAP plot demonstrating different DRG neuronal clusters. Plots were generated based on online available analyzed data published by Tavares et al.<sup>[S3]</sup> Note that particularly genes with very low expression levels, such as *OPRD1*, *OPRL1*, and *OPRK1*, and some genes with high expression levels, such as *SPP1*, *TAC1*, and *NTRK1*, appear distributed across all clusters. For *OPRK1* and *SPP1* this could be attributed to nonneuronal gene expression in satellite glial cells or macrophages surrounding DRG neurons, respectively (Figures 1F, S5).<sup>[S45,S46,S47]</sup>

### Supplemental information references

- S1. Stacher, G., Steinringer, H., Winklehner, S., Mittelbach, G., and Schneider, C. (1983). Effects of graded oral doses of meptazinol and pentazocine in comparison with placebo on experimentally induced pain in healthy humans. *Br J Clin Pharmacol* 16, 149-156. 10.1111/j.1365-2125.1983.tb04979.x.
- S2. van der Burght, M., Rasmussen, S.E., Arendt-Nielsen, L., and Bjerring, P. (1994). Morphine does not affect laser induced warmth and pin prick pain thresholds. *Acta Anaesthesiol Scand* 38, 161-164. 10.1111/j.1399-6576.1994.tb03859.x.
- S3. Gustorff, B., Hoerauf, K.H., Lierz, P., and Kress, H.G. (2003). Comparison of different quantitative sensory testing methods during remifentanyl infusion in volunteers. *Br J Anaesth* 91, 203-208. 10.1093/bja/aeg161.
- S4. Naef, M., Curatolo, M., Petersen-Felix, S., Arendt-Nielsen, L., Zbinden, A., and Brenneisen, R. (2003). The analgesic effect of oral delta-9-tetrahydrocannabinol (THC), morphine, and a THC-morphine combination in healthy subjects under experimental pain conditions. *PAIN* 105, 79-88. 10.1016/s0304-3959(03)00163-5.
- S5. Angst, M.S., Ramaswamy, B., Davies, M.F., and Maze, M. (2004). Comparative analgesic and mental effects of increasing plasma concentrations of dexmedetomidine and alfentanil in humans. *Anesthesiology* 101, 744-752. 10.1097/00000542-200409000-00024.
- S6. Cortinez, L.I., Hsu, Y.W., Sum-Ping, S.T., Young, C., Keifer, J.C., Macleod, D., Robertson, K.M., Wright, D.R., Moretti, E.W., and Somma, J. (2004). Dexmedetomidine pharmacodynamics: Part II: Crossover comparison of the analgesic effect of dexmedetomidine and remifentanyl in healthy volunteers. *Anesthesiology* 101, 1077-1083. 10.1097/00000542-200411000-00006.
- S7. Fillingim, R.B., Ness, T.J., Glover, T.L., Campbell, C.M., Hastie, B.A., Price, D.D., and Staud, R. (2005). Morphine responses and experimental pain: sex differences in side effects and cardiovascular responses but not analgesia. *J Pain* 6, 116-124. 10.1016/j.jpain.2004.11.005.
- S8. Arendt-Nielsen, L., Olesen, A.E., Staahl, C., Menzaghi, F., Kell, S., Wong, G.Y., and Drewes, A.M. (2009). Analgesic efficacy of peripheral kappa-opioid receptor agonist CR665 compared to oxycodone in a multi-modal, multi-tissue experimental human pain model: selective effect on visceral pain. *Anesthesiology* 111, 616-624. 10.1097/ALN.0b013e3181af6356.
- S9. Eisenberg, E., Midbari, A., Haddad, M., and Pud, D. (2010). Predicting the analgesic effect to oxycodone by 'static' and 'dynamic' quantitative sensory testing in healthy subjects. *Pain* 151, 104-109. 10.1016/j.pain.2010.06.025.
- S10. Andresen, T., Upton, R.N., Foster, D.J., Christrup, L.L., Arendt-Nielsen, L., and Drewes, A.M. (2011). Pharmacokinetic/pharmacodynamic relationships of transdermal buprenorphine and fentanyl in experimental human pain models. *Basic Clin Pharmacol Toxicol* 108, 274-284. 10.1111/j.1742-7843.2010.00649.x.
- S11. Angst, M.S., Phillips, N.G., Drover, D.R., Tingle, M., Ray, A., Swan, G.E., Lazzeroni, L.C., and Clark, D.J. (2012). Pain sensitivity and opioid analgesia: a pharmacogenomic twin study. *Pain* 153, 1397-1409. 10.1016/j.pain.2012.02.022.
- S12. King, C.D., Goodin, B., Glover, T.L., Riley, J.L., Hou, W., Staud, R., and Fillingim, R.B. (2013). Is the pain-reducing effect of opioid medication reliable? A psychophysical study of morphine and pentazocine analgesia. *Pain* 154, 476-483. 10.1016/j.pain.2012.12.009.
- S13. Olesen, A.E., Brock, C., Sverrisdóttir, E., Larsen, I.M., and Drewes, A.M. (2014). Sensitivity of quantitative sensory models to morphine analgesia in humans. *J Pain Res* 7, 717-726. 10.2147/jpr.S73044.
- S14. Prosenz, J., and Gustorff, B. (2017). Midazolam as an active placebo in 3 fentanyl-validated nociceptive pain models. *Pain* 158, 1264-1271. 10.1097/j.pain.0000000000000910.
- S15. Wolff, B.B., Kantor, T.G., Jarvik, M.E., and Laska, E. (1966). Response of experimental pain to analgesic drugs. 1. Morphine, aspirin, and placebo. *Clin Pharmacol Ther* 7, 224-238. 10.1002/cpt196672224.
- S16. Jarvik, L.F., Simpson, J.H., Guthrie, D., and Liston, E.H. (1981). Morphine, experimental pain, and psychological reactions. *Psychopharmacology (Berl)* 75, 124-131. 10.1007/bf00432173.
- S17. Posner, J., Telekes, A., Crowley, D., Phillipson, R., and Peck, A.W. (1985). Effects of an opiate on cold-induced pain and the CNS in healthy volunteers. *Pain* 23, 73-82. 10.1016/0304-3959(85)90232-5.

- S18. Holland, R.L., Harkin, N.E., Coleshaw, S.R., Jones, D.A., Peck, A.W., and Telekes, A. (1987). Dipipanone and nifedipine in cold induced pain; analgesia not due to skin warming. *Br J Clin Pharmacol* 24, 823-826. 10.1111/j.1365-2125.1987.tb03253.x.
- S19. Cleeland, C.S., Nakamura, Y., Howland, E.W., Morgan, N.R., Edwards, K.R., and Backonja, M. (1996). Effects of oral morphine on cold pressor tolerance time and neuropsychological performance. *Neuropsychopharmacology* 15, 252-262. 10.1016/0893-133x(95)00205-r.
- S20. Winchester, W.J., Gore, K., Glatt, S., Petit, W., Gardiner, J.C., Conlon, K., Postlethwaite, M., Saintot, P.P., Roberts, S., Gosset, J.R., et al. (2014). Inhibition of TRPM8 channels reduces pain in the cold pressor test in humans. *J Pharmacol Exp Ther* 351, 259-269. 10.1124/jpet.114.216010.
- S21. Kleine-Borgmann, J., Wilhelmi, J., Kratel, J., Baumann, F., Schmidt, K., Zunhammer, M., and Bingel, U. (2021). Tilidine and dipyron (metamizole) in cold pressor pain: A pooled analysis of efficacy, tolerability, and safety in healthy volunteers. *Clin Transl Sci* 14, 1997-2007. 10.1111/cts.13058.
- S22. Watso, J.C., Huang, M., Belval, L.N., Cimino, F.A., 3rd, Jarrard, C.P., Hendrix, J.M., Hinojosa-Laborde, C., and Crandall, C.G. (2022). Low-dose fentanyl reduces pain perception, muscle sympathetic nerve activity responses, and blood pressure responses during the cold pressor test. *Am J Physiol Regul Integr Comp Physiol* 322, R64-r76. 10.1152/ajpregu.00218.2021.
- S23. Samii, K., Feret, J., Harari, A., and Viars, P. (1979). Selective spinal analgesia. *Lancet* 1, 1142.
- S24. Wang, J.K., Nauss, L.A., and Thomas, J.E. (1979). Pain relief by intrathecally applied morphine in man. *Anesthesiology* 50, 149-151. 10.1097/00000542-197902000-00013.
- S25. Baraka, A., Noueihid, R., and Hajj, S. (1981). Intrathecal injection of morphine for obstetric analgesia. *Anesthesiology* 54, 136-140. 10.1097/00000542-198102000-00007.
- S26. Gray, J.R., Fromme, G.A., Nauss, L.A., Wang, J.K., and Ilstrup, D.M. (1986). Intrathecal morphine for post-thoracotomy pain. *Anesth Analg* 65, 873-876.
- S27. Abboud, T.K., Dror, A., Mosaad, P., Zhu, J., Mantilla, M., Swart, F., Gangolly, J., Silao, P., Makar, A., Moore, J., and et al. (1988). Mini-dose intrathecal morphine for the relief of post-cesarean section pain: safety, efficacy, and ventilatory responses to carbon dioxide. *Anesth Analg* 67, 137-143.
- S28. Kirson, L.E., Goldman, J.M., and Slover, R.B. (1989). Low-dose intrathecal morphine for postoperative pain control in patients undergoing transurethral resection of the prostate. *Anesthesiology* 71, 192-195. 10.1097/00000542-198908000-00004.
- S29. Leighton, B.L., DeSimone, C.A., Norris, M.C., and Ben-David, B. (1989). Intrathecal narcotics for labor revisited: the combination of fentanyl and morphine intrathecally provides rapid onset of profound, prolonged analgesia. *Anesth Analg* 69, 122-125.
- S30. Cohen, S.E., Cherry, C.M., Holbrook, R.H., Jr., el-Sayed, Y.Y., Gibson, R.N., and Jaffe, R.A. (1993). Intrathecal sufentanil for labor analgesia--sensory changes, side effects, and fetal heart rate changes. *Anesth Analg* 77, 1155-1160. 10.1213/00000539-199312000-00013.
- S31. D'Angelo, R., Anderson, M.T., Philip, J., and Eisenach, J.C. (1994). Intrathecal sufentanil compared to epidural bupivacaine for labor analgesia. *Anesthesiology* 80, 1209-1215. 10.1097/00000542-199406000-00007.
- S32. Angel, I.F., Gould, H.J., Jr., and Carey, M.E. (1998). Intrathecal morphine pump as a treatment option in chronic pain of nonmalignant origin. *Surg Neurol* 49, 92-98; discussion 98-99. 10.1016/s0090-3019(97)00287-5.
- S33. Schuchard, M., Krames, E.S., and Lanning, R. (1998). Intraspinial analgesia for nonmalignant pain: a retrospective analysis for efficacy, safety and feasibility in 50 patients. *Neuromodulation* 1, 46-56. 10.1111/j.1525-1403.1998.tb00029.x.
- S34. Anderson, V.C., and Burchiel, K.J. (1999). A prospective study of long-term intrathecal morphine in the management of chronic nonmalignant pain. *Neurosurgery* 44, 289-300; discussion 300-281. 10.1097/00006123-199902000-00026.
- S35. Gwartz, K.H., Young, J.V., Byers, R.S., Alley, C., Levin, K., Walker, S.G., and Stoelting, R.K. (1999). The safety and efficacy of intrathecal opioid analgesia for acute postoperative pain: seven years' experience with 5969 surgical patients at Indiana University Hospital. *Anesth Analg* 88, 599-604. 10.1097/00000539-199903000-00026.
- S36. Shaladi, A., Saltari, M.R., Piva, B., Crestani, F., Tartari, S., Pinato, P., Micheletto, G., and Dall'Ara, R. (2007). Continuous intrathecal morphine infusion in patients with vertebral fractures due to osteoporosis. *Clin J Pain* 23, 511-517. 10.1097/AJP.0b013e31806a23d4.

- S37. Zacest, A., Anderson, V.C., and Burchiel, K.J. (2009). The Glass Half Empty or Half Full-How Effective Are Long-Term Intrathecal Opioids in Post-herpetic Neuralgia? A Case Series and Review of the Literature. *Neuromodulation* *12*, 219-223. 10.1111/j.1525-1403.2009.00218.x.
- S38. Fabiano, A.J., Doyle, C., and Plunkett, R.J. (2012). Intrathecal medications in post-herpetic neuralgia. *Pain Med* *13*, 1088-1090. 10.1111/j.1526-4637.2012.01401.x.
- S39. Wang, C., Gu, L., Ruan, Y., Geng, X., Xu, M., Yang, N., Yu, L., Jiang, Y., Zhu, C., Yang, Y., et al. (2019). Facilitation of MrgprD by TRP-A1 promotes neuropathic pain. *Faseb j* *33*, 1360-1373. 10.1096/fj.201800615RR.
- S40. Warwick, C., Cassidy, C., Hachisuka, J., Wright, M.C., Baumbauer, K.M., Adelman, P.C., Lee, K.H., Smith, K.M., Sheahan, T.D., Ross, S.E., and Koerber, H.R. (2021). MrgprdCre lineage neurons mediate optogenetic allodynia through an emergent polysynaptic circuit. *Pain* *162*, 2120-2131. 10.1097/j.pain.0000000000002227.
- S41. Usoskin, D., Furlan, A., Islam, S., Abdo, H., Lönnnerberg, P., Lou, D., Hjerling-Leffler, J., Haeggström, J., Kharchenko, O., Kharchenko, P.V., et al. (2015). Unbiased classification of sensory neuron types by large-scale single-cell RNA sequencing. *Nat Neurosci* *18*, 145-153. 10.1038/nn.3881.
- S42. Zylka, M.J., Rice, F.L., and Anderson, D.J. (2005). Topographically distinct epidermal nociceptive circuits revealed by axonal tracers targeted to Mrgprd. *Neuron* *45*, 17-25. 10.1016/j.neuron.2004.12.015.
- S43. Tavares-Ferreira, D., Shiers, S., Ray, P.R., Wangzhou, A., Jeevakumar, V., Sankaranarayanan, I., Cervantes, A.M., Reese, J.C., Chamesian, A., Copits, B.A., et al. (2022). Spatial transcriptomics of dorsal root ganglia identifies molecular signatures of human nociceptors. *Sci Transl Med* *14*, eabj8186. 10.1126/scitranslmed.abj8186.
- S44. Klein, A., Solinski, H.J., Malewicz, N.M., Jeong, H.F., Sypek, E.I., Shimada, S.G., Hartke, T.V., Wooten, M., Wu, G., Dong, X., et al. (2021). Pruriception and neuronal coding in nociceptor subtypes in human and nonhuman primates. *Elife* *10*. 10.7554/eLife.64506.
- S45. O'Brien, E.R., Garvin, M.R., Stewart, D.K., Hinohara, T., Simpson, J.B., Schwartz, S.M., and Giachelli, C.M. (1994). Osteopontin is synthesized by macrophage, smooth muscle, and endothelial cells in primary and restenotic human coronary atherosclerotic plaques. *Arterioscler Thromb* *14*, 1648-1656. 10.1161/01.atv.14.10.1648.
- S46. Szulzewsky, F., Pelz, A., Feng, X., Synowitz, M., Markovic, D., Langmann, T., Holtman, I.R., Wang, X., Eggen, B.J., Boddeke, H.W., et al. (2015). Glioma-associated microglia/macrophages display an expression profile different from M1 and M2 polarization and highly express Gpnmb and Spp1. *PLoS One* *10*, e0116644. 10.1371/journal.pone.0116644.
- S47. Morse, C., Tabib, T., Sembrat, J., Buschur, K.L., Bittar, H.T., Valenzi, E., Jiang, Y., Kass, D.J., Gibson, K., Chen, W., et al. (2019). Proliferating SPP1/MERTK-expressing macrophages in idiopathic pulmonary fibrosis. *Eur Respir J* *54*. 10.1183/13993003.02441-2018.
